# Supplementary material for: Expanding the genome-targeting scope and the site selectivity of high-precision base editors
Source: PubMed Central journal article supplement (PMC6994485; doi:10.1038/s41467-020-14465-z), 2020-01-31
Supplement: 41467_2020_14465_MOESM1_ESM.pdf [file 41467_2020_14465_MOESM1_ESM.pdf]

## Supplementary Information

Expanding the genome-targeting scope and the site selectivity of high-precision base editors

Tan et al.

**Supplementary Table 1** Target protospacer sequences analyzed in this study. Target Cs are shown in red, with the subscript numbers indicating their position relative to the PAM. The PAM sequence is shown in blue.

| Target       | Sequence (5' → 3')                                                                                                                                                                                         | Analysis method      |
|--------------|------------------------------------------------------------------------------------------------------------------------------------------------------------------------------------------------------------|----------------------|
| Can1-1       | ATACTAAT <sup>C-12</sup> <sup>C-11</sup> ATGCCGCCAGTGG                                                                                                                                                     | canavanine selection |
| Can1-2       | GCAAATT <sup>C-13</sup> AAATATTTACGTTGG                                                                                                                                                                    | canavanine selection |
| Can1-3       | ACGT <sup>C-16</sup> <sup>C-15</sup> AAAATTGAATGACTTGG                                                                                                                                                     | canavanine selection |
| Can1-4       | TTT <sup>C-17</sup> AAGGTAAGTACTGACTAGTTGG                                                                                                                                                                 | canavanine selection |
| Can1-5       | T <sup>C-19</sup> <sup>C-18</sup> AATAACGGAATCCAAGTGG                                                                                                                                                      | canavanine selection |
| PolyC-1-NGA  | A <sup>C-19</sup> <sup>C-18</sup> <sup>C-17</sup> <sup>C-16</sup> <sup>C-15</sup> <sup>C-14</sup> <sup>C-13</sup> <sup>C-12</sup> TCATCTTTGAGTGA                                                           | NGS                  |
| PolyC-2-NGA  | <sup>C-20</sup> <sup>C-19</sup> <sup>C-18</sup> <sup>C-17</sup> <sup>C-16</sup> <sup>C-15</sup> <sup>C-14</sup> TGAGGCTTATGAGAGA                                                                           | NGS                  |
| PolyC-3-NGCG | T <sup>C-19</sup> <sup>C-18</sup> <sup>C-17</sup> <sup>C-16</sup> <sup>C-15</sup> <sup>C-14</sup> TTCTGCCCAATTAGGCG                                                                                        | NGS                  |
| PolyC-4-NGCG | TTC <sup>C-18</sup> <sup>C-17</sup> <sup>C-16</sup> <sup>C-15</sup> <sup>C-14</sup> <sup>C-13</sup> ACTCACAGGAAGAGCG                                                                                       | NGS                  |
| PolyC-5-NGC  | A <sup>C-19</sup> <sup>C-18</sup> <sup>C-17</sup> <sup>C-16</sup> <sup>C-15</sup> AAC <sup>C-12</sup> <sup>C-11</sup> <sup>C-10</sup> <sup>C-9</sup> <sup>C-8</sup> <sup>C-7</sup> <sup>C-6</sup> ATCAGTGC | NGS                  |
| PolyC-6-NGT  | <sup>C-20</sup> <sup>C-19</sup> <sup>C-18</sup> <sup>C-17</sup> <sup>C-16</sup> <sup>C-15</sup> <sup>C-14</sup> <sup>C-13</sup> <sup>C-12</sup> TTGATACTTCCTGT                                             | NGS                  |
| PolyC-7      | <sup>C-21</sup> <sup>C-20</sup> <sup>C-19</sup> <sup>C-18</sup> <sup>C-17</sup> <sup>C-16</sup> <sup>C-15</sup> <sup>C-14</sup> <sup>C-13</sup> ATGTT <sup>C-7</sup> <sup>C-6</sup> GA GATCGG              | NGS                  |
| PolyC-8      | TATAC <sup>C-20</sup> <sup>C-19</sup> <sup>C-18</sup> <sup>C-17</sup> <sup>C-16</sup> <sup>C-15</sup> <sup>C-14</sup> <sup>C-13</sup> TATATGGTAAAAAGG                                                      | NGS                  |
| PSEN1-L166P  | GCC <sup>C-18</sup> TATTATATCATCTCTATTGT                                                                                                                                                                   | -                    |
| TYR-Y327C    | ATTCAC <sup>C-15</sup> ATTGGGTCAAAGTCAAGG                                                                                                                                                                  | -                    |

**Supplementary Table 2** Width of the editing windows of A3A-derived BEs in two polycytidine motifs (polyC-7 and polyC-8; cf. Fig. 2). The approximate width of the editing window was defined as the number of nucleotides within which editing efficiency exceeds the half-maximal value (21).

| <b>Base editor</b>   | <b>PolyC-7</b> | <b>PolyC-8</b> |
|----------------------|----------------|----------------|
| A3A-BE3              | 5              | 6              |
| A3A-NL-BE3           | 9              | 7              |
| A3A $\Delta$ 194-BE3 | 4              | 4              |
| A3A $\Delta$ 190-BE3 | 6              | 3              |
| A3A $\Delta$ 186-BE3 | 4              | 2              |
| A3A $\Delta$ 182-BE3 | 3              | 2              |
| A3A $\Delta$ 178-BE3 | 3              | 2              |

**Supplementary Table 3** Oligonucleotides used in this study.

***Primers for construction of sgRNA plasmids***

| <b>Primer name</b> | <b>Sequence (5' → 3')</b>                                     |
|--------------------|---------------------------------------------------------------|
| sgRNA-Can1-1       | AAAGATAAATGATCGATACTAATCCATGCCGCCAGGTTTTAGAGCTAGAAATAGCAAGT   |
| sgRNA-Can1-2       | AAAGATAAATGATCGGCAAATTC A AATATTTACGTGTTTTAGAGCTAGAAATAGCAAGT |
| sgRNA-Can1-3       | AAAGATAAATGATCGACGTCCAAAATTGAATGACTGTTTTAGAGCTAGAAATAGCAAGT   |
| sgRNA-Can1-4       | AAAGATAAATGATCGTTTCAAGGTACTGAACTAGTGTTTTAGAGCTAGAAATAGCAAGT   |
| sgRNA-Can1-5       | AAAGATAAATGATCGTCCAATAACGGAATCCAAC T GTTTTAGAGCTAGAAATAGCAAGT |
| sgRNA-PolyC-1      | AAAGATAAATGATCGACCCCCCCTCATCTTTGAGGTTTTAGAGCTAGAAATAGCAAGT    |
| sgRNA- PolyC-2     | AAAGATAAATGATCGCCCCCCTGAGGCTTATGAGGTTTTAGAGCTAGAAATAGCAAGT    |
| sgRNA- PolyC-3     | AAAGATAAATGATCGTCCCCCCTTCTGCCCAATTAGTTTTAGAGCTAGAAATAGCAAGT   |
| sgRNA- PolyC-4     | AAAGATAAATGATCGTTCCCCCCTCACAGGAAGGTTTTAGAGCTAGAAATAGCAAGT     |
| sgRNA- PolyC-5     | AAAGATAAATGATCGACCCCCAACCCCCCATCAGGTTTTAGAGCTAGAAATAGCAAGT    |
| sgRNA- PolyC-6     | AAAGATAAATGATCGCCCCCCTTGATACTTCCGTTTTAGAGCTAGAAATAGCAAGT      |
| sgRNA- PolyC-7     | AAAGATAAATGATCGCCCCCCTATGTTCCGAGATGTTTTAGAGCTAGAAATAGCAAGT    |
| sgRNA- PolyC-8     | AAAGATAAATGATCGCCCCCCTATATGGTAAAAGTTTTAGAGCTAGAAATAGCAAGT     |
| sgRNA-Rev          | TATAGGGCGAATTGGGTACCGGCCGCAAATTAAG                            |

***Primers for construction of base editors***

| <b>Primer name</b> | <b>Sequence (5' → 3')</b>                       | <b>Constructs</b> |
|--------------------|-------------------------------------------------|-------------------|
| VQR-BE3-1F         | GGACAAGGGTAGGGATTTCCG                           | VQR-BE3           |
| VQR-BE3-1R         | GAATCCGCCGTATTTCTTGG                            |                   |
| VQR-BE3-2F         | CCAAGAAATACGGCGGATTCGTTTCTCCTACAGTCGCTTACAG     |                   |
| VQR-BE3-2R         | CAGGACCTCCTTTGTAGATCTGTATTGCTTTCTGTCTATGGTGGTGT |                   |
| VQR-BE3-3F         | GATCTACAAAGGAGGTCCTG                            |                   |
| VQR-BE3-3R         | TTGAATAACTAAAGCCCATG                            |                   |
| VRER-BE3-1F        | GGACAAGGGTAGGGATTTCCG                           | VRER-BE3          |
| VRER-BE3-1R        | ACCTTTCTGCAGCTCGCGCGCACTAGCGAGCAT               |                   |
| VRER-BE3-2F        | GAGCTGCAGAAAGGTAACGA                            |                   |
| VRER-BE3-2R        | CTTTGTAGATCTGTATTCCTTTCTGTCTATGGT               |                   |
| VRER-BE3-3F        | TACAGATCTACAAAGGAGGT                            |                   |
| VRER-BE3-3R        | ATGTTACATGCGTACACGCG                            |                   |

|               |                                                                        |                       |
|---------------|------------------------------------------------------------------------|-----------------------|
| Cas9NG-BE3-1F | GGACAAGGGTAGGGATTTCCG                                                  | Cas9-NG-BE3           |
| Cas9NG-BE3-1R | GCTGTTCCTTTTCGGGCGGATACTTTCCCTTGGA                                     |                       |
| Cas9NG-BE3-2F | CCGAAAAGGAACAGCGACAA                                                   |                       |
| Cas9NG-BE3-2R | GTTACCTTTCTGCAGGAAGCGCGCACTAGCGAGCAT                                   |                       |
| Cas9NG-BE3-3F | CTGCAGAAAGGTAACGAGCT                                                   |                       |
| Cas9NG-BE3-3R | AAGTACTTGAAGGCTCGAGGCGGCCCAAGTT                                        |                       |
| Cas9NG-BE3-4F | GCCTTCAAGTACTTCGACACCACCATAGACAGAAAGGTATACAGATCTACAAAG<br>GAGG         |                       |
| Cas9NG-BE3-4R | ATGTTACATGCGTACACGCG                                                   |                       |
| cCDA1v-1F     | GGACAAGGGTAGGGATTTCCG                                                  | cCDA1-VQR/VRER/NG-BE3 |
| cCDA1v-1R     | CAGATTCAGAAGTACCTGGAGTTTCAGAACCAGAGTCTCCACCGAGCTGAGAG<br>A             |                       |
| cCDA1v-2F     | TCCAGGTACTTCTGAATCTGCTACTCCAGAATCTATGACCGACGCTGAGTACGT<br>GAG          |                       |
| cCDA1v-2R     | ATTTGCAGGCATTTGCTCGGCATGCCGGTAGAGGTGTGGT                               |                       |
| A3A-NL-1F     | AGAAAAAACCCCGGATTCTAGAACTAGTGGATCCCCCGGGAAAAAAATGGAAG<br>CCAGCCCAGCATC | A3A-NL-BE3            |
| A3A-NL-1R     | TCTTGTCCATGTTTCCCTGATTCTGGAGAA                                         |                       |
| A3A-NL-2F     | TCAGGGAAACATGGACAAGAAGTACTCCAT                                         |                       |
| A3A-NL-2R     | ATTACTAAAGATCTCCTGCAGGTAGCAGATCCGATTCTTTC                              |                       |
| A3B-NL-1F     | AGAAAAAACCCCGGATTCTAGAACTAGTGGATCCCCCGGGAAAAAAATGAATC<br>CACAGATCAGAAA | A3B-NL-BE3            |
| A3B-NL-1R     | TCTTGTCCATGTTTCCCTGATTCTGGAGAA                                         |                       |
| A3B-NL-2F     | TCAGGGAAACATGGACAAGAAGTACTCCAT                                         |                       |
| A3B-NL-2R     | ATTACTAAAGATCTCCTGCAGGTAGCAGATCCGATTCTTTC                              |                       |
| hAID-NL-1F    | AGAAAAAACCCCGGATTCTAGAACTAGTGGATCCCCCGGGAAAAAAATGGACA<br>GCCTCTTGATGAA | hAID-NL-BE3           |
| hAID -NL-1R   | TCTTGTCCATAAGTCCCAAAGTACGAAATG                                         |                       |
| hAID -NL-2F   | TTTGGGACTTATGGACAAGAAGTACTCCAT                                         |                       |
| hAID -NL-2R   | ATTACTAAAGATCTCCTGCAGGTAGCAGATCCGATTCTTTC                              |                       |
| mAID-NL-1F    | AGAAAAAACCCCGGATTCTAGAACTAGTGGATCCCCCGGGAAAAAAATGGACA<br>GCCTTCTGATGAA | mAID-NL-BE3           |
| mAID -NL-1R   | TCTTGTCCATAAATCCCAACATACGAAATG                                         |                       |
| mAID -NL-2F   | GTTGGGATTTATGGACAAGAAGTACTCCAT                                         |                       |

|               |                                                                     |                          |
|---------------|---------------------------------------------------------------------|--------------------------|
| mAID -NL-2R   | ATTACTAAAGATCTCCTGCAGGTAGCAGATCCGATTCTTTC                           |                          |
| cAICDA -NL-1F | AGAAAAACCCCGGATTCTAGAACTAGTGGATCCCCGGGAAAAAATGAGCA<br>AGCTGGACAGTGT | cAICDA-NL-<br>BE3        |
| cAICDA -NL-1R | TCTTGTCCATAAGGCCAGCAGAGCGAAGC                                       |                          |
| cAICDA -NL-2F | GCTGGGCCTTATGGACAAGAAGTACTCCAT                                      |                          |
| cAICDA -NL-2R | ATTACTAAAGATCTCCTGCAGGTAGCAGATCCGATTCTTTC                           |                          |
| A3G -NL-1F    | AGAAAAACCCCGGATTCTAGAACTAGTGGATCCCCGGGAAAAAATGAAAC<br>CGCATTTTCGCAA | A3G-NL-BE3               |
| A3G -NL-1R    | TCTTGTCCATATTTTCTGGTTTTGCAGGA                                       |                          |
| A3G -NL-2F    | CCAGGAAAATATGGACAAGAAGTACTCCAT                                      |                          |
| A3G -NL-2R    | ATTACTAAAGATCTCCTGCAGGTAGCAGATCCGATTCTTTC                           |                          |
| A3A-1F        | AGAAAAACCCCGGATTCTAGAACTAGTGGATCCCCGGGAAAAAATGGAAG<br>CCAGCCCAGCATC | A3A-BE3                  |
| A3A -1R       | CAGATTCAGAAGTACCTGGAGTTTCAGAACCAGAGTTTCCCTGATTCTGGAGA<br>A          |                          |
| A3A-2F        | TCCAGGTA CTCTGAATCTGCTACTCCAGAATCTATGGACAAGAAGTACTCC                |                          |
| A3A-2R        | ATTACTAAAGATCTCCTGCAGGTAGCAGATCCGATTCTTTC                           |                          |
| A3A194-1F     | AGAAAAACCCCGGATTCTAGAACTAGTGGATCCCCGGGAAAAAATGGAAG<br>CCAGCCCAGCATC | A3A $\Delta$ 194-<br>BE3 |
| A3A194 -1R    | TCTTGTCCATGAGAATGGCCCGCAGCCTCC                                      |                          |
| A3A194-2F     | GGCATTCTCATGGACAAGAAGTACTCCAT                                       |                          |
| A3A194-2R     | ATTACTAAAGATCTCCTGCAGGTAGCAGATCCGATTCTTTC                           |                          |
| A3A190-1F     | AGAAAAACCCCGGATTCTAGAACTAGTGGATCCCCGGGAAAAAATGGAAG<br>CCAGCCCAGCATC | A3A $\Delta$ 190-<br>BE3 |
| A3A190 -1R    | TCTTGTCCATCAGCCTCCACTCAGGGCTT                                       |                          |
| A3A190-2F     | TGGGAGGCTGATGGACAAGAAGTACTCCAT                                      |                          |
| A3A190-2R     | ATTACTAAAGATCTCCTGCAGGTAGCAGATCCGATTCTTTC                           |                          |
| A3A186-1F     | AGAAAAACCCCGGATTCTAGAACTAGTGGATCCCCGGGAAAAAATGGAAG<br>CCAGCCCAGCATC | A3A $\Delta$ 186-<br>BE3 |
| A3A186 -1R    | TCTTGTCCATCAGGGCTTGGCTGTGCTCAT                                      |                          |
| A3A186-2F     | CCAAGCCCTGATGGACAAGAAGTACTCCAT                                      |                          |
| A3A186-2R     | ATTACTAAAGATCTCCTGCAGGTAGCAGATCCGATTCTTTC                           |                          |
| A3A182-1F     | AGAAAAACCCCGGATTCTAGAACTAGTGGATCCCCGGGAAAAAATGGAAG<br>CCAGCCCAGCATC | A3A $\Delta$ 182-<br>BE3 |
| A3A182 -1R    | TCTTGTCCATGTGCTCATCTAGTCCATCCC                                      |                          |

|            |                                                                  |                    |
|------------|------------------------------------------------------------------|--------------------|
| A3A182-2F  | AGATGAGCACATGGACAAGAAGTACTCCAT                                   |                    |
| A3A182-2R  | ATTACTAAAGATCTCCTGCAGGTAGCAGATCCGATTCTTTC                        |                    |
| A3A178-1F  | AGAAAAACCCCGGATTCTAGAAGTGGATCCCCGGGAAAAAATGGAAG<br>CCAGCCCAGCATC | A3AΔ178-<br>BE3    |
| A3A178 -1R | TCTTGTCCATTCCATCCCAGGGCTGGAAGG                                   |                    |
| A3A178-2F  | CTGGGATGGAATGGACAAGAAGTACTCCAT                                   |                    |
| A3A178-2R  | ATTACTAAAGATCTCCTGCAGGTAGCAGATCCGATTCTTTC                        |                    |
| A3A154-1F  | AGAAAAACCCCGGATTCTAGAAGTGGATCCCCGGGAAAAAATGGAAG<br>CCAGCCCAGCATC | A3AΔ154-<br>BE3    |
| A3A154 -1R | TCTTGTCCATGGTCATGATGGAGACTTGGG                                   |                    |
| A3A154-2F  | CATCATGACCATGGACAAGAAGTACTCCAT                                   |                    |
| A3A154-2R  | ATTACTAAAGATCTCCTGCAGGTAGCAGATCCGATTCTTTC                        |                    |
| eA3A-1F    | AGAAAAACCCCGGATTCTAGAAGTGGATCCCCGGGAAAAAATGGAAG<br>CCAGCCCAGCATC | eA3A-BE3           |
| eA3A-1R    | AAGATTCTTAGCCTGGCCGTGTAGAAAGCCCCTGTGC                            |                    |
| eA3A-2F    | CAGGCTAAGAATCTTCTCTG                                             |                    |
| eA3A-2R    | ATTACTAAAGATCTCCTGCAGGTAGCAGATCCGATTCTTTC                        |                    |
| R128A-1F   | AGAAAAACCCCGGATTCTAGAAGTGGATCCCCGGGAAAAAATGAGTT<br>CCGAGACAGGC   | A3A(R128A)-<br>BE3 |
| R128A-1R   | TCGTAATCATAGATGGCGGCAGCGAAGATACG                                 |                    |
| R128A-2F   | CATCTATGATTACGACCCCC                                             |                    |
| R128A-2R   | ATTACTAAAGATCTCCTGCAGGTAGCAGATCCGATTCTTTC                        |                    |
| Y130F-1F   | AGAAAAACCCCGGATTCTAGAAGTGGATCCCCGGGAAAAAATGAGTT<br>CCGAGACAGGC   | A3A(Y130F)-<br>BE3 |
| Y130F-1R   | AGGGGGTCGTAATCAAAGATGCGGGCAGCGA                                  |                    |
| Y130F-2F   | TGATTACGACCCCCTATATA                                             |                    |
| Y130F-2R   | ATTACTAAAGATCTCCTGCAGGTAGCAGATCCGATTCTTTC                        |                    |

***Primers for amplification of target regions for high-throughput sequencing (HTS)***

| <b>Primer name</b>   | <b>Sequence (5' → 3')</b>     |
|----------------------|-------------------------------|
| PolyC-1-HTS-index1-F | ATCACGGGAAAGACTGGCTCATCAAACC  |
| PolyC-1-HTS-index1-R | GCCTAATTTTATAAATTTTGGAGGAAGCG |
| PolyC-1-HTS-index2-F | CGATGTGGAAAGACTGGCTCATCAAACC  |
| PolyC-1-HTS-index2-R | TGGTCATTTTATAAATTTTGGAGGAAGCG |
| PolyC-1-HTS-index3-F | AGTTCCGGAAAGACTGGCTCATCAAACC  |

|                      |                               |
|----------------------|-------------------------------|
| PolyC-1-HTS-index3-R | CTCTACTTTTATAAATTTTGAGGAAGCG  |
| PolyC-1-HTS-index4-F | CACTCAGGAAAGACTGGCTCATCAAACC  |
| PolyC-1-HTS-index4-R | TGTTGGTTTTATAAATTTTGAGGAAGCG  |
| PolyC-1-HTS-index5-F | GTGGCCGAAAGACTGGCTCATCAAACC   |
| PolyC-1-HTS-index5-R | CGAAACTTTTATAAATTTTGAGGAAGCG  |
| PolyC-1-HTS-index6-F | CGTACGGGAAAGACTGGCTCATCAAACC  |
| PolyC-1-HTS-index6-R | CCACTCTTTTATAAATTTTGAGGAAGCG  |
| PolyC-1-HTS-index7-F | GGTAGCGGAAAGACTGGCTCATCAAACC  |
| PolyC-1-HTS-index7-R | ATCAGTTTTTATAAATTTTGAGGAAGCG  |
| PolyC-2-HTS-index1-F | CACCGGTGCGCACATCAATCATTTTC    |
| PolyC-2-HTS-index1-R | ATCGTGTGGCTTACTGTAAGCTACAGG   |
| PolyC-2-HTS-index2-F | ATGAGCTGCGCACATCAATCATTTTC    |
| PolyC-2-HTS-index2-R | AGGAATTGGCTTACTGTAAGCTACAGG   |
| PolyC-2-HTS-index3-F | CAAAGTGCGCACATCAATCATTTTC     |
| PolyC-2-HTS-index3-R | TAGTTGTGGCTTACTGTAAGCTACAGG   |
| PolyC-2-HTS-index4-F | TCGGCATGCGCACATCAATCATTTTC    |
| PolyC-2-HTS-index4-R | GAATGATGGCTTACTGTAAGCTACAGG   |
| PolyC-2-HTS-index5-F | TCCCGATGCGCACATCAATCATTTTC    |
| PolyC-2-HTS-index5-R | CTTCGATGGCTTACTGTAAGCTACAGG   |
| PolyC-2-HTS-index6-F | CTATACTGCGCACATCAATCATTTTC    |
| PolyC-2-HTS-index6-R | TCTGAGTGGCTTACTGTAAGCTACAGG   |
| PolyC-2-HTS-index7-F | TTAGGCTGCGCACATCAATCATTTTC    |
| PolyC-2-HTS-index7-R | TGACCATGGCTTACTGTAAGCTACAGG   |
| PolyC-3-HTS-index1-F | ACATGTTCCGCCATGTCCAACACG      |
| PolyC-3-HTS-index1-R | CAGATCCTTTAATAATTTCCGAAATAGG  |
| PolyC-3-HTS-index2-F | ACTTGATCCGCCATGTCCAACACG      |
| PolyC-3-HTS-index2-R | GATCAGCTTTAATAATTTCCGAAATAGG  |
| PolyC-3-HTS-index3-F | TAGCTTTCCGCCATGTCCAACACG      |
| PolyC-3-HTS-index3-R | GGCTACCTTTAATAATTTCCGAAATAGG  |
| PolyC-3-HTS-index4-F | CCGTCCTCCGCCATGTCCAACACG      |
| PolyC-3-HTS-index4-R | GTAGAGCTTTAATAATTTCCGAAATAGG  |
| PolyC-3-HTS-index5-F | GTCCGCTCCGCCATGTCCAACACG      |
| PolyC-3-HTS-index5-R | GTGAAACTTTAATAATTTCCGAAATAGG  |
| PolyC-3-HTS-index6-F | GTTTCGTCCGCCATGTCCAACACG      |
| PolyC-3-HTS-index6-R | GAGTGGCTTTAATAATTTCCGAAATAGG  |
| PolyC-3-HTS-index7-F | ACTGATTCCGCCATGTCCAACACG      |
| PolyC-3-HTS-index7-R | ATTCCTCTTTAATAATTTCCGAAATAGG  |
| PolyC-4-HTS-index1-F | CAACTAGGGAAAATAAAGGGAAAGACC   |
| PolyC-4-HTS-index1-R | CACGATTGACCCAAAGGGAAACATAAGAC |
| PolyC-4-HTS-index2-F | CAGGCGGGGAAAATAAAGGGAAAGACC   |



|                       |                              |
|-----------------------|------------------------------|
| PolyC-4-HTS-index2-R  | CATGGCTGACCCAAAGGGAACATAAGAC |
| PolyC-4-HTS-index3-F  | ACAGTGGGGAAAATAAAGGGAAAGACC  |
| PolyC-4-HTS-index3-R  | GCCAATTGACCCAAAGGGAACATAAGAC |
| PolyC-4-HTS-index4-F  | CTTGTAGGGAAAATAAAGGGAAAGACC  |
| PolyC-4-HTS-index4-R  | AGTCAATGACCCAAAGGGAACATAAGAC |
| PolyC-4-HTS-index5-F  | ATGTCAGGGAAAATAAAGGGAAAGACC  |
| PolyC-4-HTS-index5-R  | CATTTTTGACCCAAAGGGAACATAAGAC |
| PolyC-4-HTS-index6-F  | CCAACAGGGAAAATAAAGGGAAAGACC  |
| PolyC-4-HTS-index6-R  | CGGAATTGACCCAAAGGGAACATAAGAC |
| PolyC-4-HTS-index7-F  | TCATTCGGGAAAATAAAGGGAAAGACC  |
| PolyC-4-HTS-index7-R  | CTAGCTTGACCCAAAGGGAACATAAGAC |
| PolyC-5-HTS-index1-F  | CACCGGGTCACACCACGCTCAAACGG   |
| PolyC-5-HTS-index1-R  | ATCGTGAGATCTGGTCCACGGCCTGG   |
| PolyC-5-HTS-index2-F  | ATGAGCGTCACACCACGCTCAAACGG   |
| PolyC-5-HTS-index2-R  | AGGAATAGATCTGGTCCACGGCCTGG   |
| PolyC-5-HTS-index3-F  | CAAAGGTTCACACCACGCTCAAACGG   |
| PolyC-5-HTS-index3-R  | TAGTTGAGATCTGGTCCACGGCCTGG   |
| PolyC-5-HTS-index4-F  | TCGGCAGTCACACCACGCTCAAACGG   |
| PolyC-5-HTS-index4-R  | GAATGAAGATCTGGTCCACGGCCTGG   |
| PolyC-5-HTS-index5-F  | TCCCGAGTCACACCACGCTCAAACGG   |
| PolyC-5-HTS-index5-R  | CTTCGAAGATCTGGTCCACGGCCTGG   |
| PolyC-5-HTS-index6-F  | CTATACGTCACACCACGCTCAAACGG   |
| PolyC-5-HTS-index6-R  | TCTGAGAGATCTGGTCCACGGCCTGG   |
| PolyC-5-HTS-index7-F  | TTAGGCGTCACACCACGCTCAAACGG   |
| PolyC-5-HTS-index7-R  | TGACCAAGATCTGGTCCACGGCCTGG   |
| PolyC-5-HTS-index8-F  | ACATGTGTCACACCACGCTCAAACGG   |
| PolyC-5-HTS-index8-R  | CAGATCAGATCTGGTCCACGGCCTGG   |
| PolyC-5-HTS-index9-F  | ACTTGAGTCACACCACGCTCAAACGG   |
| PolyC-5-HTS-index9-R  | GATCAGAGATCTGGTCCACGGCCTGG   |
| PolyC-5-HTS-index10-F | TAGCTTGTCACACCACGCTCAAACGG   |
| PolyC-5-HTS-index10-R | GGCTACAGATCTGGTCCACGGCCTGG   |
| PolyC-5-HTS-index11-F | CCGTCCGTCACACCACGCTCAAACGG   |
| PolyC-5-HTS-index11-R | GTAGAGAGATCTGGTCCACGGCCTGG   |
| PolyC-6-HTS-index1-F  | GTCCGCTTCGGGGTTATTTATTTTTCG  |
| PolyC-6-HTS-index1-R  | GTGAAAGTTTGATTGGTCAAGTTGGC   |
| PolyC-6-HTS-index2-F  | GTTTCGTTTCGGGGTTATTTATTTTTCG |
| PolyC-6-HTS-index2-R  | GAGTGGGTTTGATTGGTCAAGTTGGC   |
| PolyC-6-HTS-index3-F  | ACTGATTTTCGGGGTTATTTATTTTTCG |
| PolyC-6-HTS-index3-R  | ATTCCTGTTTGATTGGTCAAGTTGGC   |
| PolyC-6-HTS-index4-F  | CAACTATTCGGGGTTATTTATTTTTCG  |

|                       |                              |
|-----------------------|------------------------------|
| PolyC-6-HTS-index4-R  | CACGATGTTTGATTGGTCAAGTTGGC   |
| PolyC-6-HTS-index5-F  | CAGGCGTTCGGGGTTATTTATTTTTCG  |
| PolyC-6-HTS-index5-R  | CATGGCGTTTGATTGGTCAAGTTGGC   |
| PolyC-6-HTS-index6-F  | ACAGTGTTTCGGGGTTATTTATTTTTCG |
| PolyC-6-HTS-index6-R  | GCCAATGTTTGATTGGTCAAGTTGGC   |
| PolyC-6-HTS-index7-F  | CTTGATTCGGGGTTATTTATTTTTCG   |
| PolyC-6-HTS-index7-R  | AGTCAAGTTTGATTGGTCAAGTTGGC   |
| PolyC-7-HTS-index1-F  | CGATGTACTGCGGAAGTGAGGGGAGC   |
| PolyC-7-HTS-index1-R  | TGGTCATATCCGTGCGCGTAATCCTTCT |
| PolyC-7-HTS-index2-F  | ATCACGACTGCGGAAGTGAGGGGAGC   |
| PolyC-7-HTS-index2-R  | GCCTAATATCCGTGCGCGTAATCCTTCT |
| PolyC-7-HTS-index3-F  | AGTTCCACTGCGGAAGTGAGGGGAGC   |
| PolyC-7-HTS-index3-R  | CTCTACTATCCGTGCGCGTAATCCTTCT |
| PolyC-7-HTS-index4-F  | CACTCAACTGCGGAAGTGAGGGGAGC   |
| PolyC-7-HTS-index4-R  | TGTTGGTATCCGTGCGCGTAATCCTTCT |
| PolyC-7-HTS-index5-F  | GTGGCCACTGCGGAAGTGAGGGGAGC   |
| PolyC-7-HTS-index5-R  | CGAAACTATCCGTGCGCGTAATCCTTCT |
| PolyC-7-HTS-index6-F  | CGTACGACTGCGGAAGTGAGGGGAGC   |
| PolyC-7-HTS-index6-R  | CCACTCTATCCGTGCGCGTAATCCTTCT |
| PolyC-7-HTS-index7-F  | GGTAGCACTGCGGAAGTGAGGGGAGC   |
| PolyC-7-HTS-index7-R  | ATCAGTTATCCGTGCGCGTAATCCTTCT |
| PolyC-7-HTS-index8-F  | CACCGGACTGCGGAAGTGAGGGGAGC   |
| PolyC-7-HTS-index8-R  | ATCGTGTATCCGTGCGCGTAATCCTTCT |
| PolyC-7-HTS-index9-F  | ATGAGCACTGCGGAAGTGAGGGGAGC   |
| PolyC-7-HTS-index9-R  | AGGAATTATCCGTGCGCGTAATCCTTCT |
| PolyC-7-HTS-index10-F | CAAAGACTGCGGAAGTGAGGGGAGC    |
| PolyC-7-HTS-index10-R | TAGTTGTATCCGTGCGCGTAATCCTTCT |
| PolyC-7-HTS-index11-F | TCGGCAACTGCGGAAGTGAGGGGAGC   |
| PolyC-7-HTS-index11-R | GAATGATATCCGTGCGCGTAATCCTTCT |
| PolyC-7-HTS-index12-F | TCCCGAACTGCGGAAGTGAGGGGAGC   |
| PolyC-7-HTS-index12-R | CTTCGATATCCGTGCGCGTAATCCTTCT |
| PolyC-7-HTS-index13-F | CTATACACTGCGGAAGTGAGGGGAGC   |
| PolyC-7-HTS-index13-R | TCTGAGTATCCGTGCGCGTAATCCTTCT |
| PolyC-7-HTS-index14-F | TTAGGCACTGCGGAAGTGAGGGGAGC   |
| PolyC-7-HTS-index14-R | TGACCATATCCGTGCGCGTAATCCTTCT |
| PolyC-7-HTS-index15-F | ACATGTACTGCGGAAGTGAGGGGAGC   |
| PolyC-7-HTS-index15-F | CAGATCTATCCGTGCGCGTAATCCTTCT |
| PolyC-7-HTS-index16-F | ACTTGAAGTGCAGGAAGTGAGGGGAGC  |
| PolyC-7-HTS-index16-R | GATCAGTATCCGTGCGCGTAATCCTTCT |
| PolyC-7-HTS-index17-F | TAGCTTACTGCGGAAGTGAGGGGAGC   |

|                       |                                 |
|-----------------------|---------------------------------|
| PolyC-7-HTS-index17-R | GGCTACTATCCGTGCGCGTAATCCTTCT    |
| PolyC-7-HTS-index18-F | CCGTCCACTGCGGAAGTGAGGGGAGC      |
| PolyC-7-HTS-index18-R | GTAGAGTATCCGTGCGCGTAATCCTTCT    |
| PolyC-7-HTS-index19-F | GTCCGCACTGCGGAAGTGAGGGGAGC      |
| PolyC-7-HTS-index19-R | GTGAAATATCCGTGCGCGTAATCCTTCT    |
| PolyC-7-HTS-index20-F | GTTTCGACTGCGGAAGTGAGGGGAGC      |
| PolyC-7-HTS-index20-R | GAGTGGTATCCGTGCGCGTAATCCTTCT    |
| PolyC-7-HTS-index21-F | ACTGATACTGCGGAAGTGAGGGGAGC      |
| PolyC-7-HTS-index21-R | ATTCCTTATCCGTGCGCGTAATCCTTCT    |
| PolyC-7-HTS-index22-F | CAACTAACTGCGGAAGTGAGGGGAGC      |
| PolyC-7-HTS-index22-R | CACGATTATCCGTGCGCGTAATCCTTCT    |
| PolyC-7-HTS-index23-F | CAGGCGACTGCGGAAGTGAGGGGAGC      |
| PolyC-7-HTS-index23-R | CATGGCTATCCGTGCGCGTAATCCTTCT    |
| PolyC-7-HTS-index24-F | ACAGTGACTGCGGAAGTGAGGGGAGC      |
| PolyC-7-HTS-index24-R | GCCAATTATCCGTGCGCGTAATCCTTCT    |
| PolyC-8-HTS-index1-F  | ATCACGTTTCATCTATAAGGATATGGGTCTG |
| PolyC-8-HTS-index1-R  | CGATGTATAGCATATAATAAAAAGTGGAG   |
| PolyC-8-HTS-index2-F  | TTAGGCTTCATCTATAAGGATATGGGTCTG  |
| PolyC-8-HTS-index2-R  | TGACCAATAGCATATAATAAAAAGTGGAG   |
| PolyC-8-HTS-index3-F  | ACAGTGTTTCATCTATAAGGATATGGGTCTG |
| PolyC-8-HTS-index3-R  | GCCAATATAGCATATAATAAAAAGTGGAG   |
| PolyC-8-HTS-index4-F  | CAGATCTTCATCTATAAGGATATGGGTCTG  |
| PolyC-8-HTS-index4-R  | ACTTGAATAGCATATAATAAAAAGTGGAG   |
| PolyC-8-HTS-index5-F  | GATCAGTTTCATCTATAAGGATATGGGTCTG |
| PolyC-8-HTS-index5-R  | TAGCTTATAGCATATAATAAAAAGTGGAG   |
| PolyC-8-HTS-index6-F  | GGCTACTTCATCTATAAGGATATGGGTCTG  |
| PolyC-8-HTS-index6-R  | CTTGTAATAGCATATAATAAAAAGTGGAG   |
| PolyC-8-HTS-index7-F  | AGTCAATTCATCTATAAGGATATGGGTCTG  |
| PolyC-8-HTS-index7-R  | AGTTCCATAGCATATAATAAAAAGTGGAG   |
| PolyC-8-HTS-index8-F  | ATGTCATTCATCTATAAGGATATGGGTCTG  |
| PolyC-8-HTS-index8-R  | CCGTCCATAGCATATAATAAAAAGTGGAG   |
| PolyC-8-HTS-index9-F  | GTAGAGTTTCATCTATAAGGATATGGGTCTG |
| PolyC-8-HTS-index9-R  | GTCCGCATAGCATATAATAAAAAGTGGAG   |
| PolyC-8-HTS-index10-F | GTGAAATTCATCTATAAGGATATGGGTCTG  |
| PolyC-8-HTS-index10-R | GTGGCCATAGCATATAATAAAAAGTGGAG   |
| PolyC-8-HTS-index11-F | GTTTCGTTTCATCTATAAGGATATGGGTCTG |
| PolyC-8-HTS-index11-R | CGTACGATAGCATATAATAAAAAGTGGAG   |
| PolyC-8-HTS-index12-F | GAGTGGTTTCATCTATAAGGATATGGGTCTG |
| PolyC-8-HTS-index12-R | GGTAGCATAGCATATAATAAAAAGTGGAG   |
| PolyC-8-HTS-index13-F | ACTGATTTTCATCTATAAGGATATGGGTCTG |

|                       |                                 |
|-----------------------|---------------------------------|
| PolyC-8-HTS-index13-R | ATGAGCATAGCATATAATAAAAAGTGGAG   |
| PolyC-8-HTS-index14-F | ATTCCTTTCATCTATAAGGATATGGGTTCG  |
| PolyC-8-HTS-index14-R | CAAAAGATAGCATATAATAAAAAGTGGAG   |
| PolyC-8-HTS-index15-F | CAACTATTCATCTATAAGGATATGGGTTCG  |
| PolyC-8-HTS-index15-R | CACCGGATAGCATATAATAAAAAGTGGAG   |
| PolyC-8-HTS-index16-F | CACGATTTTCATCTATAAGGATATGGGTTCG |
| PolyC-8-HTS-index16-R | CACTCAATAGCATATAATAAAAAGTGGAG   |
| PolyC-8-HTS-index17-F | CAGGCGTTCATCTATAAGGATATGGGTTCG  |
| PolyC-8-HTS-index17-R | CATGGCATAGCATATAATAAAAAGTGGAG   |
| PolyC-8-HTS-index18-F | CATTTTTTTCATCTATAAGGATATGGGTTCG |
| PolyC-8-HTS-index18-R | CCAACAATAGCATATAATAAAAAGTGGAG   |
| PolyC-8-HTS-index19-F | CGGAATTTTCATCTATAAGGATATGGGTTCG |
| PolyC-8-HTS-index19-R | CTAGCTATAGCATATAATAAAAAGTGGAG   |
| PolyC-8-HTS-index20-F | CTATACTTCATCTATAAGGATATGGGTTCG  |
| PolyC-8-HTS-index20-R | CTCAGAATAGCATATAATAAAAAGTGGAG   |
| PolyC-8-HTS-index21-F | GACGACTTCATCTATAAGGATATGGGTTCG  |
| PolyC-8-HTS-index21-R | TAATCGATAGCATATAATAAAAAGTGGAG   |

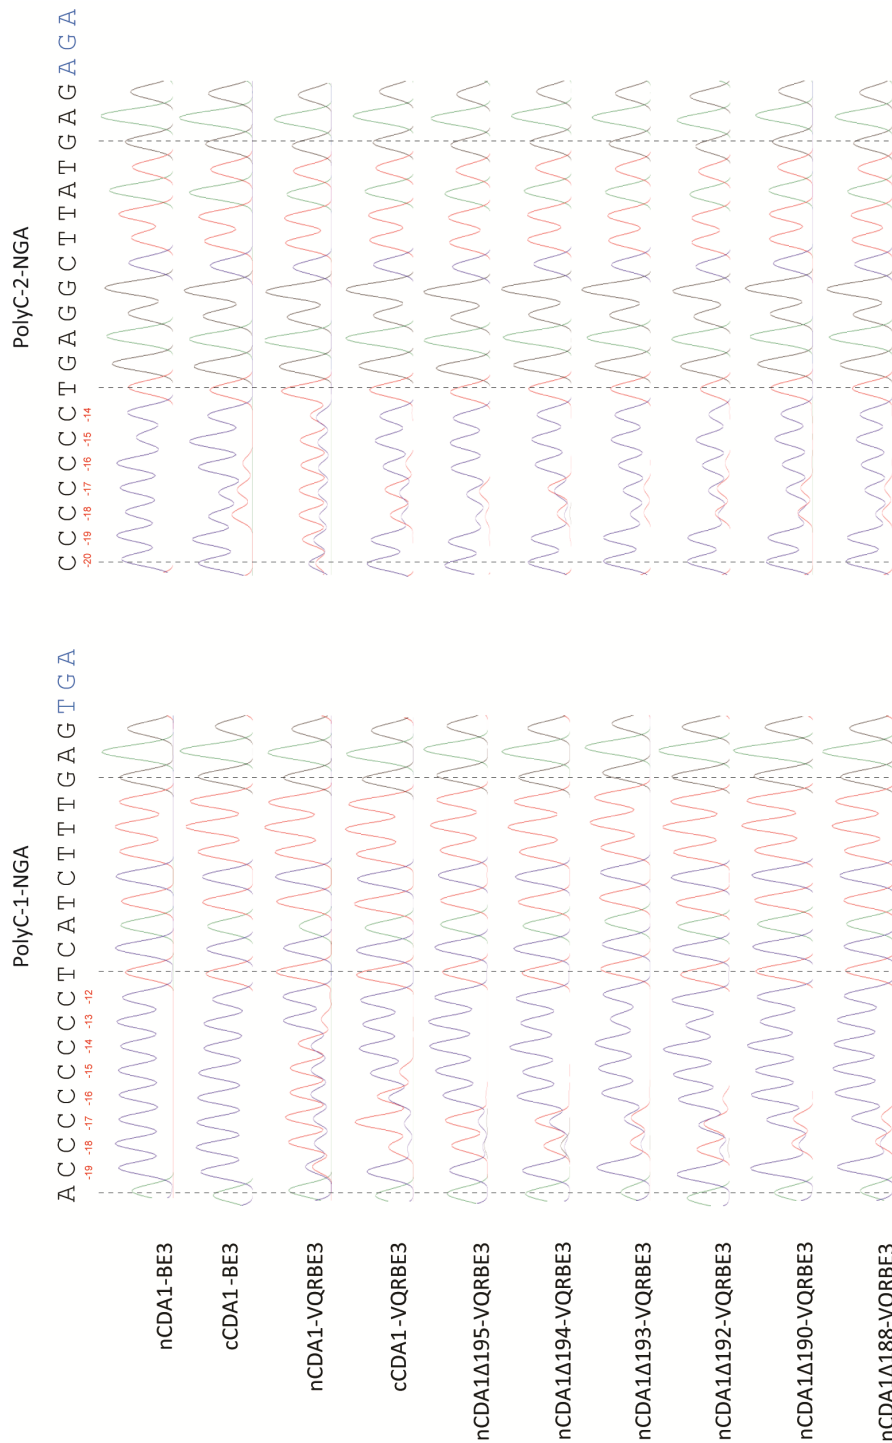

**Supplementary Figure 1** Analysis of base editing of a set of VQR-Cas9 BEs fused to the full-length CDA1 (nCDA1-VQRBE3) or C-terminally truncated versions of CDA1 (nCDA1Δ195-VQRBE3; nCDA1Δ194-VQRBE3; nCDA1Δ193-VQRBE3; nCDA1Δ192-VQRBE3; nCDA1Δ190-VQRBE3; nCDA1Δ188-VQRBE3; Fig. 1a,c). The two tested target sequences (PolyC-1-NGA and PolyC-2-NGA) both contain a polyC stretch upstream of the

PAM sequence NGA that is recognized by VQR-Cas9 (Fig. 1b). The amplified target sequences were directly sequenced by the dideoxy chain termination method (see Methods), and the sequence chromatograms are shown for each BE. The nucleotide sequences are shown above the chromatograms, with the PAM indicated in blue and the positions of the cytidines in the polyC stretch given in red (relative to the PAM). The reciprocal full-length fusion, cCDA1-VQRBE3, was also analyzed. nCDA1-BE3 and cCDA1-BE3 have no PAM in proper distance from the polyC stretch and served as negative controls.

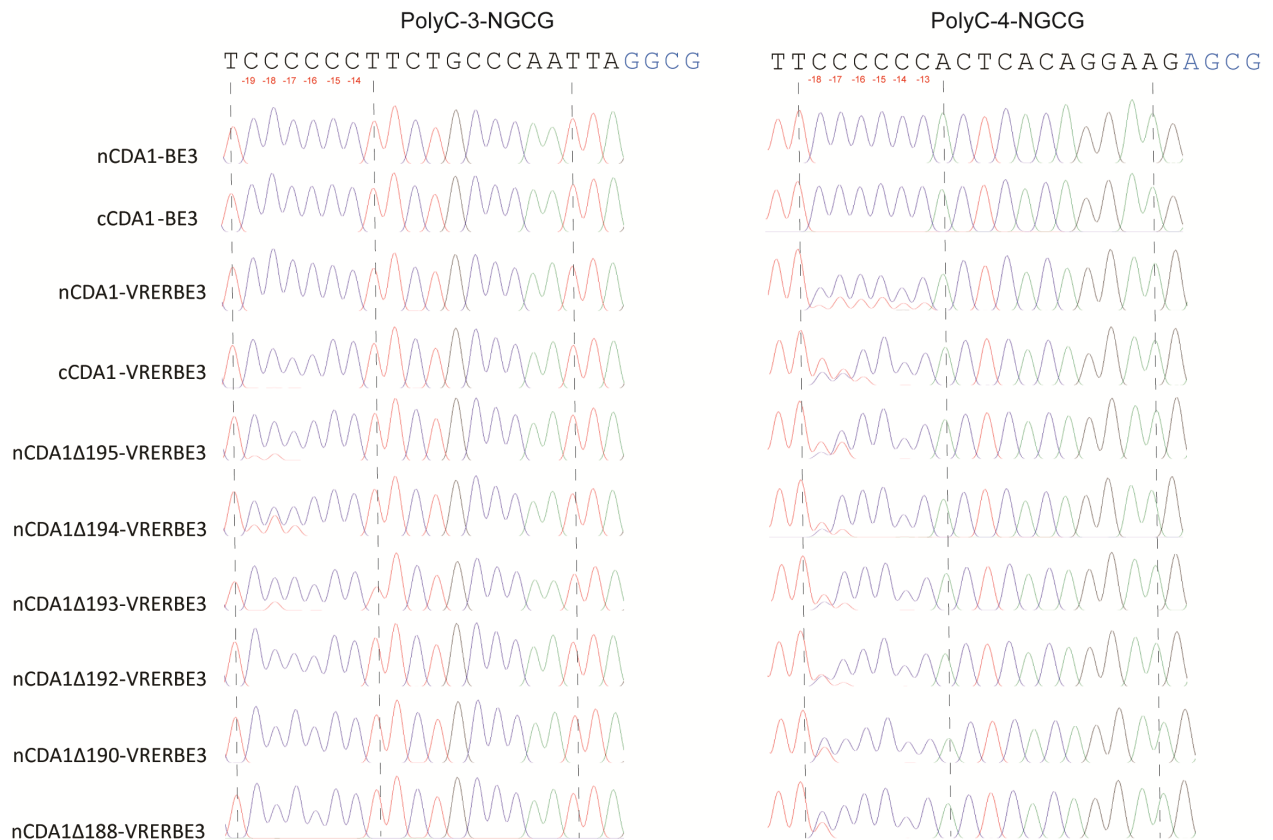

**Supplementary Figure 2** Analysis of base editing of a set of VRER-Cas9 BEs fused to the full-length CDA1 (nCDA1-VRERBE3) or C-terminally truncated versions of CDA1 (nCDA1Δ195-VRERBE3; nCDA1Δ194-VRERBE3; nCDA1Δ193-VRERBE3; nCDA1Δ192-VRERBE3; nCDA1Δ190-VRERBE3; nCDA1Δ188-VRERBE3; Fig. 1a,d). The two tested target sequences (PolyC-3-NGCG and PolyC-4-NGCG) both contain a polyC stretch upstream of the PAM sequence NGCG that is recognized by VRER-Cas9 (Fig. 1b). The amplified target sequences were directly sequenced by the dideoxy chain termination method (see Methods), and the sequence chromatograms are shown for each BE. The nucleotide sequences are shown above the chromatograms, with the PAM indicated in blue and the positions of the cytidines in the polyC stretch given in red (relative to the PAM). The reciprocal full-length fusion, cCDA1-VRERBE3, was also analyzed. nCDA1-BE3 and cCDA1-BE3 have no PAM in proper distance from the polyC stretch and served as negative controls.

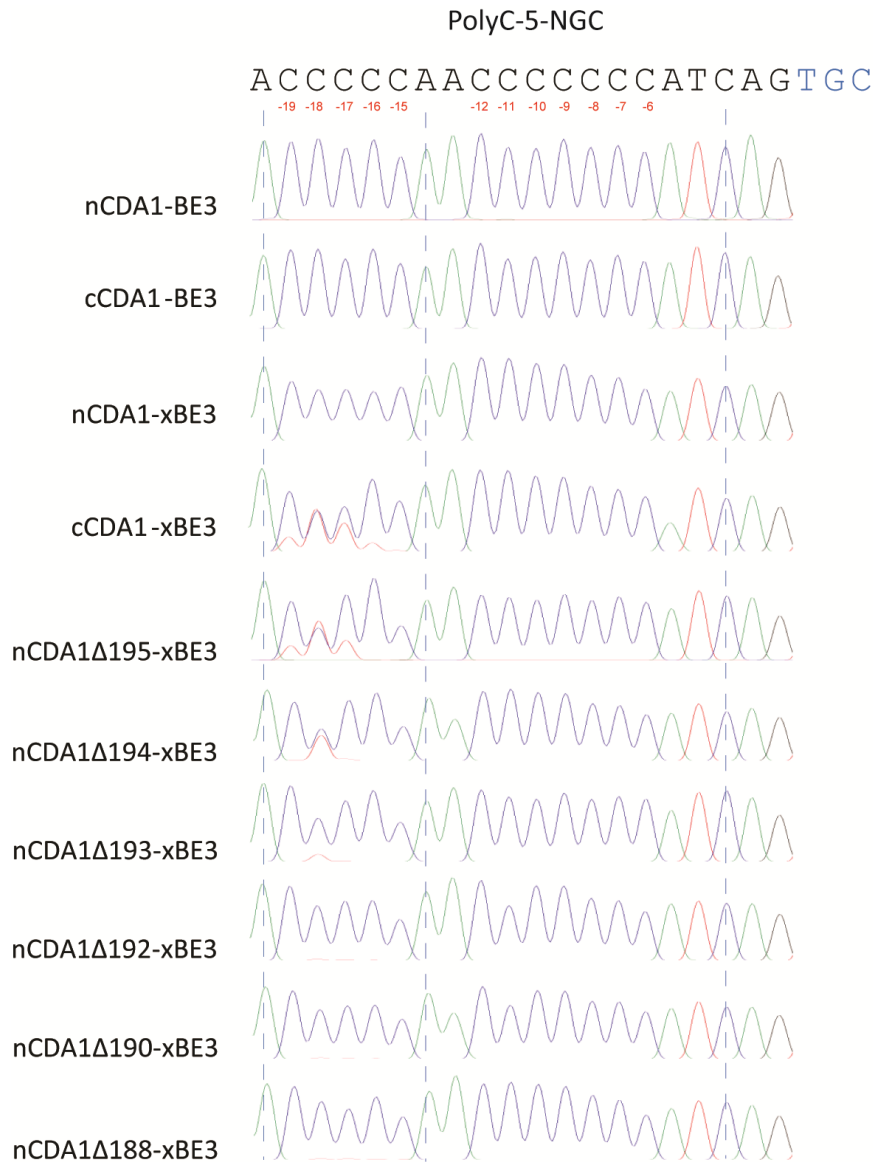

**Supplementary Figure 3** Analysis of base editing of a set of xCas9 BEs fused to the full-length CDA1 (nCDA1-xBE3) or C-terminally truncated versions of CDA1 (nCDA1Δ195-xBE3; nCDA1Δ194-xBE3; nCDA1Δ193-xBE3; nCDA1Δ192-xBE3; nCDA1Δ190-xBE3; nCDA1Δ188-xBE3; Fig. 1a,e). The tested target sequence (PolyC-5-NGC) contains a polyC stretch upstream of the PAM sequence NG that is recognized by xCas9 (Fig. 1b). The amplified target sequences were directly sequenced by the dideoxy chain termination method (see Methods), and the sequence chromatograms are shown for each BE. The nucleotide sequence is shown above the chromatograms, with the PAM indicated in blue and the positions of the cytidines in the polyC stretch given in red (relative to the PAM). The



reciprocal full-length fusion, cCDA1-xBE3, was also analyzed. nCDA1-BE3 and cCDA1-BE3 have no PAM in proper distance from the polyC stretch and served as negative controls.

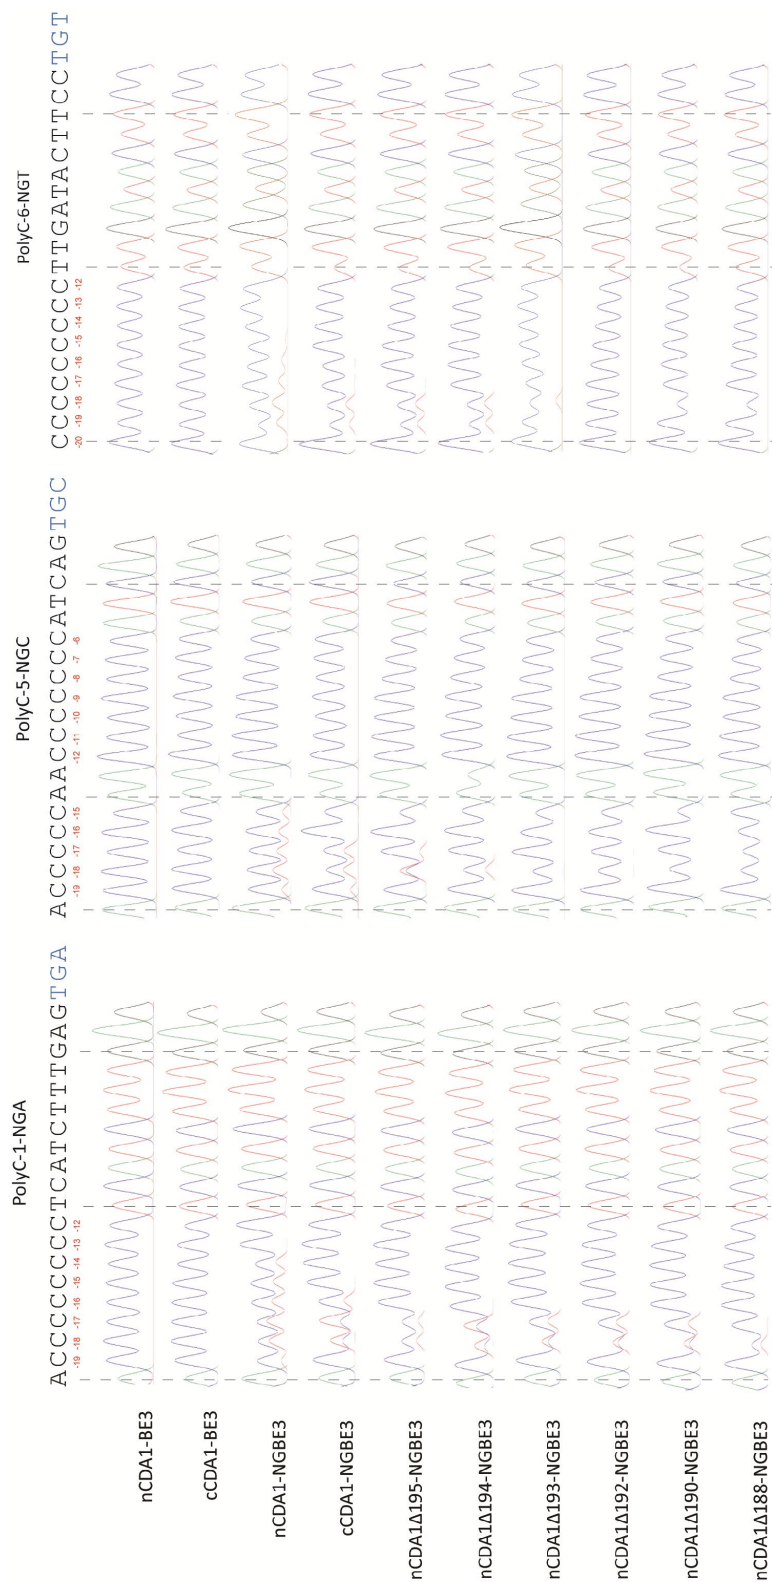

**Supplementary Figure 4** Analysis of base editing of a set of SpCas9-NG BEs fused to the full-length CDA1 (nCDA1-NGBE3) or C-terminally truncated versions of CDA1 (nCDA1Δ195-NGBE3; nCDA1Δ194-NGBE3; nCDA1Δ193-NGBE3; nCDA1Δ192-NGBE3;

nCDA1 $\Delta$ 190-NGBE3; nCDA1 $\Delta$ 188-NGBE3; Fig. 1a,f,g). The three tested target sequences (PolyC-1-NGA, PolyC-5-NGC and PolyC-6-NGT) all contain a polyC stretch upstream of the PAM sequence NG that is recognized by SpCas9-NG (Fig. 1b). The amplified target sequences were directly sequenced by the dideoxy chain termination method (see Methods), and the sequence chromatograms are shown for each BE. The nucleotide sequences are shown above the chromatograms, with the PAM indicated in blue and the positions of the cytidines in the polyC stretch given in red (relative to the PAM). The reciprocal full-length fusion, cCDA1-NGBE3, was also analyzed. nCDA1-BE3 and cCDA1-BE3 have no PAM in proper distance from the polyC stretch and served as negative controls.

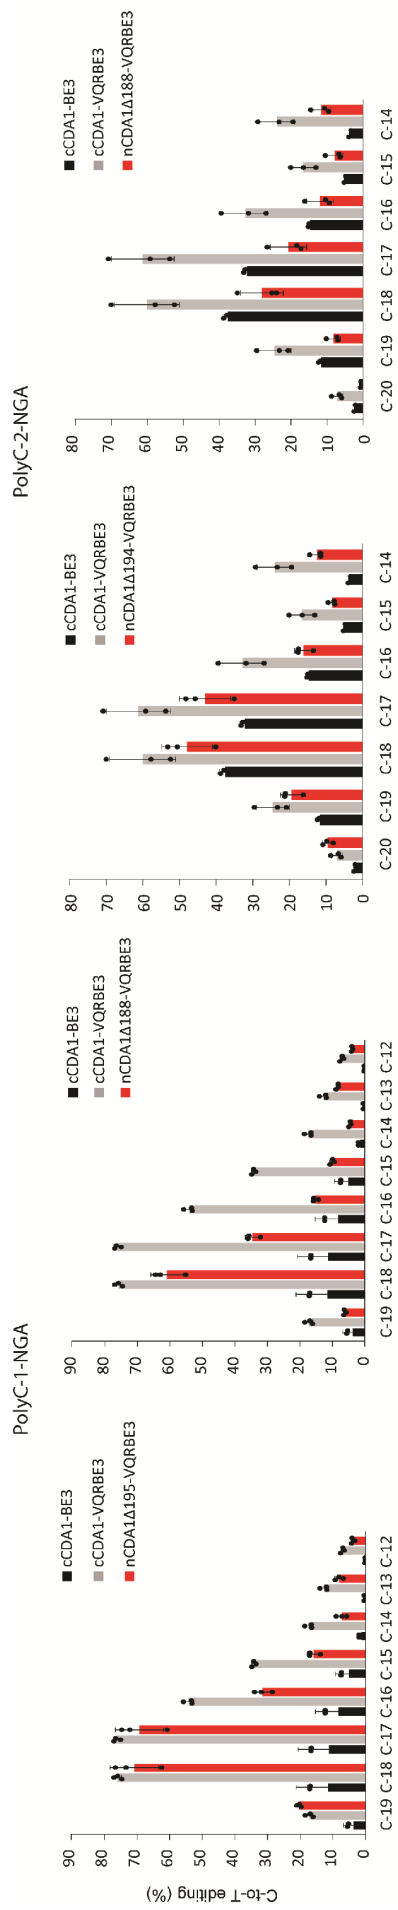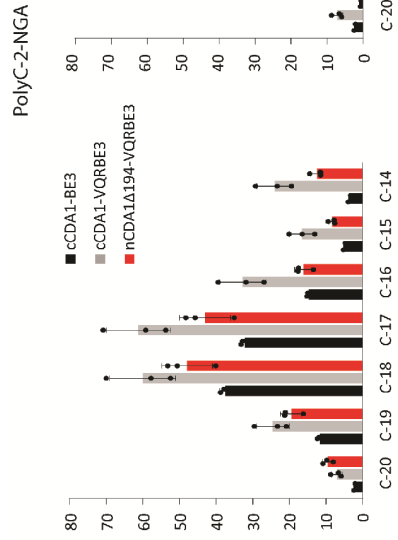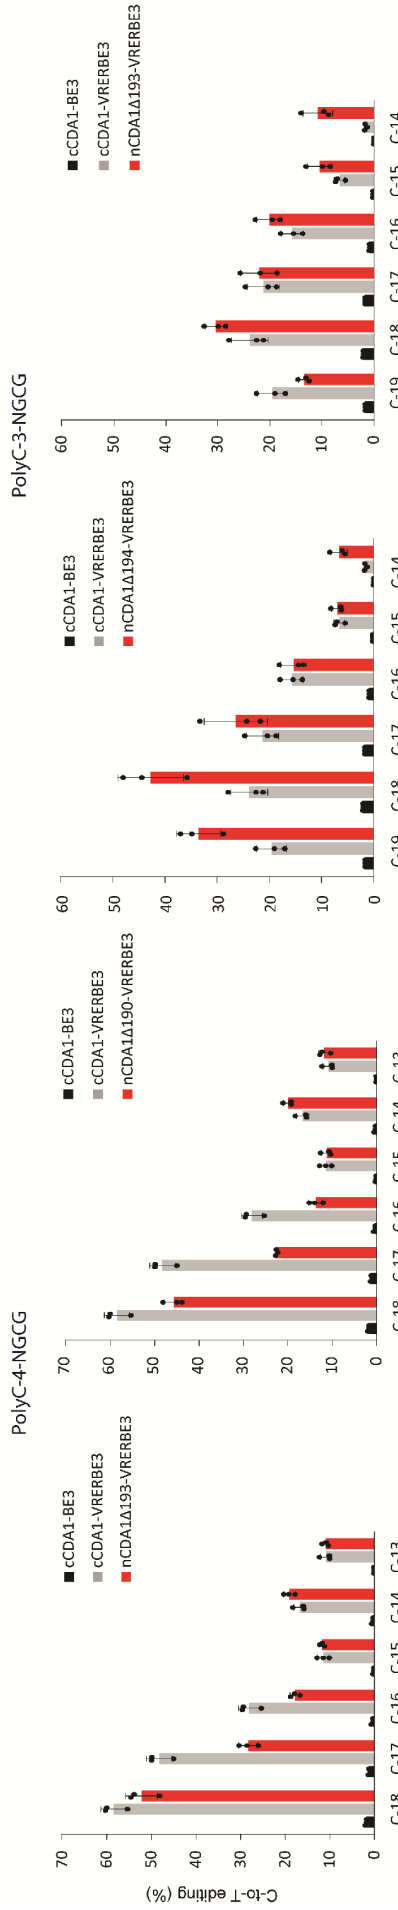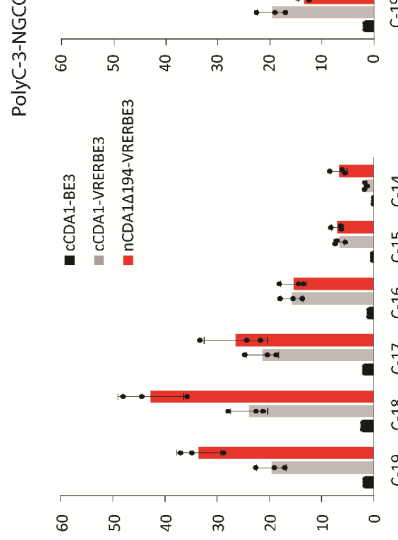

**Supplementary Figure 5** Base editing outcomes of cCDA1-VQRBE3, cCDA1-VRERBE3 and BE variants with SpCas9-VQR or SpCas9-VRER fusions to C-terminally truncated CDA1 variants. Two NGA target sites were tested (PolyC-1-NGA, PolyC-2-NGA; for sequences see Supplementary Table 1; for sequence chromatograms, see Supplementary Figure 1) for BEs with SpCas9-VQR and two NGCG target sites were tested (PolyC-3-NGCG, PolyC-4-NGCG; for sequences see Supplementary Table 1; for sequence chromatograms, see Supplementary Figure 2) for BEs with SpCas9-VRER. For comparison, the cCDA1-BE3 editor (recognizing the PAM sequence NGG) was also included. % of C-to-T editing represents the percentage of total sequencing reads with the target C converted to T. Values and error bars represent the mean and standard deviation of three independent biological replicates. Source data are provided as a Source Data file.

PolyC-1-NGA

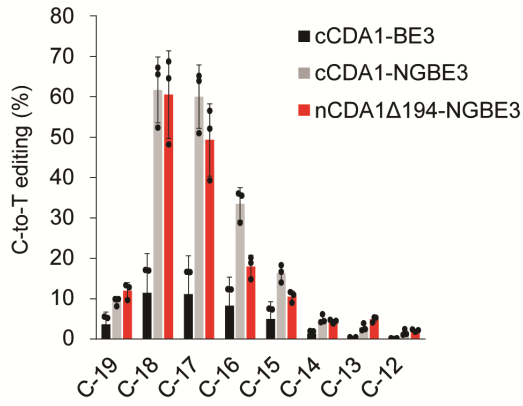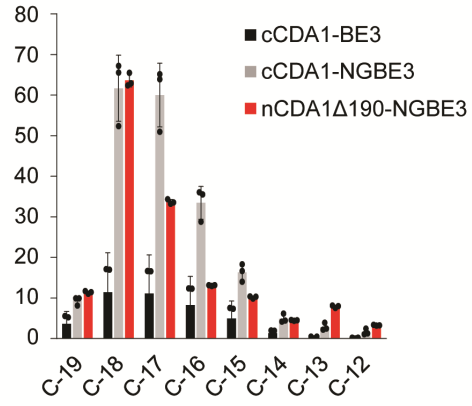

PolyC-5-NGC

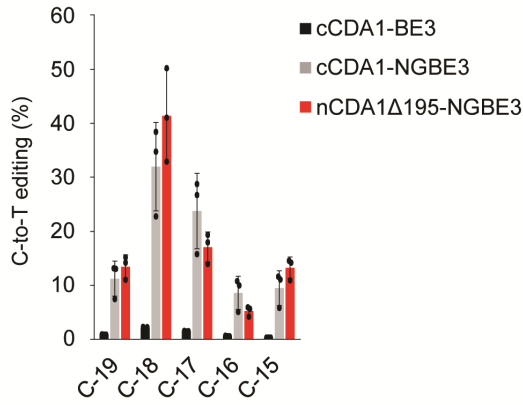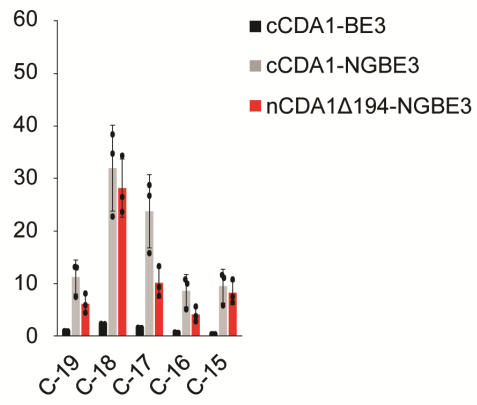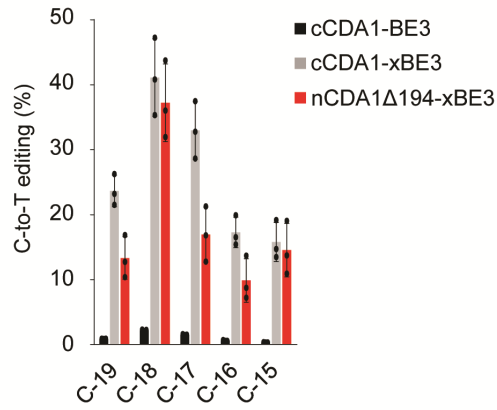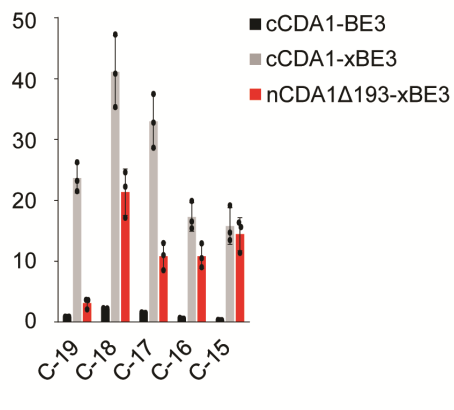

PolyC-6-NGT

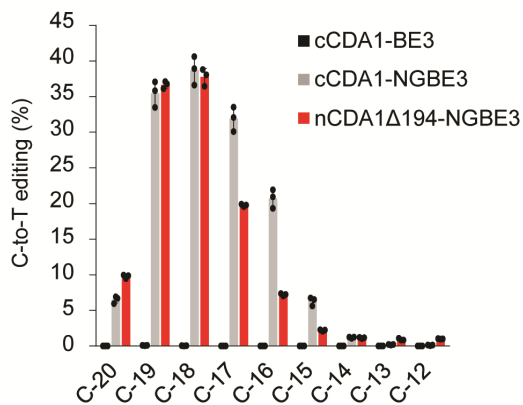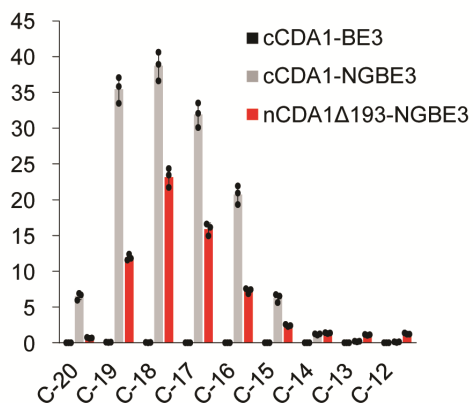

**Supplementary Figure 6** Base editing outcomes of cCDA1-NGBE3, cCDA1-xBE3 and BE variants with SpCas9-NG or xCas9 fusions to C-terminally truncated CDA1 variants. Three non-NGG target sites were tested (PolyC-1-NGA, PolyC-5-NGC and PolyC-6-NGT; for sequences see Supplementary Table 1; for sequence chromatograms, see Supplementary Figures 3 and 4). For comparison the cCDA1-BE3 editor (recognizing the PAM sequence NGG) was also included. % of C-to-T editing represents the percentage of total sequencing reads with the target C converted to T. Values and error bars represent the mean and standard deviation of three independent biological replicates. Source data are provided as a Source Data file.

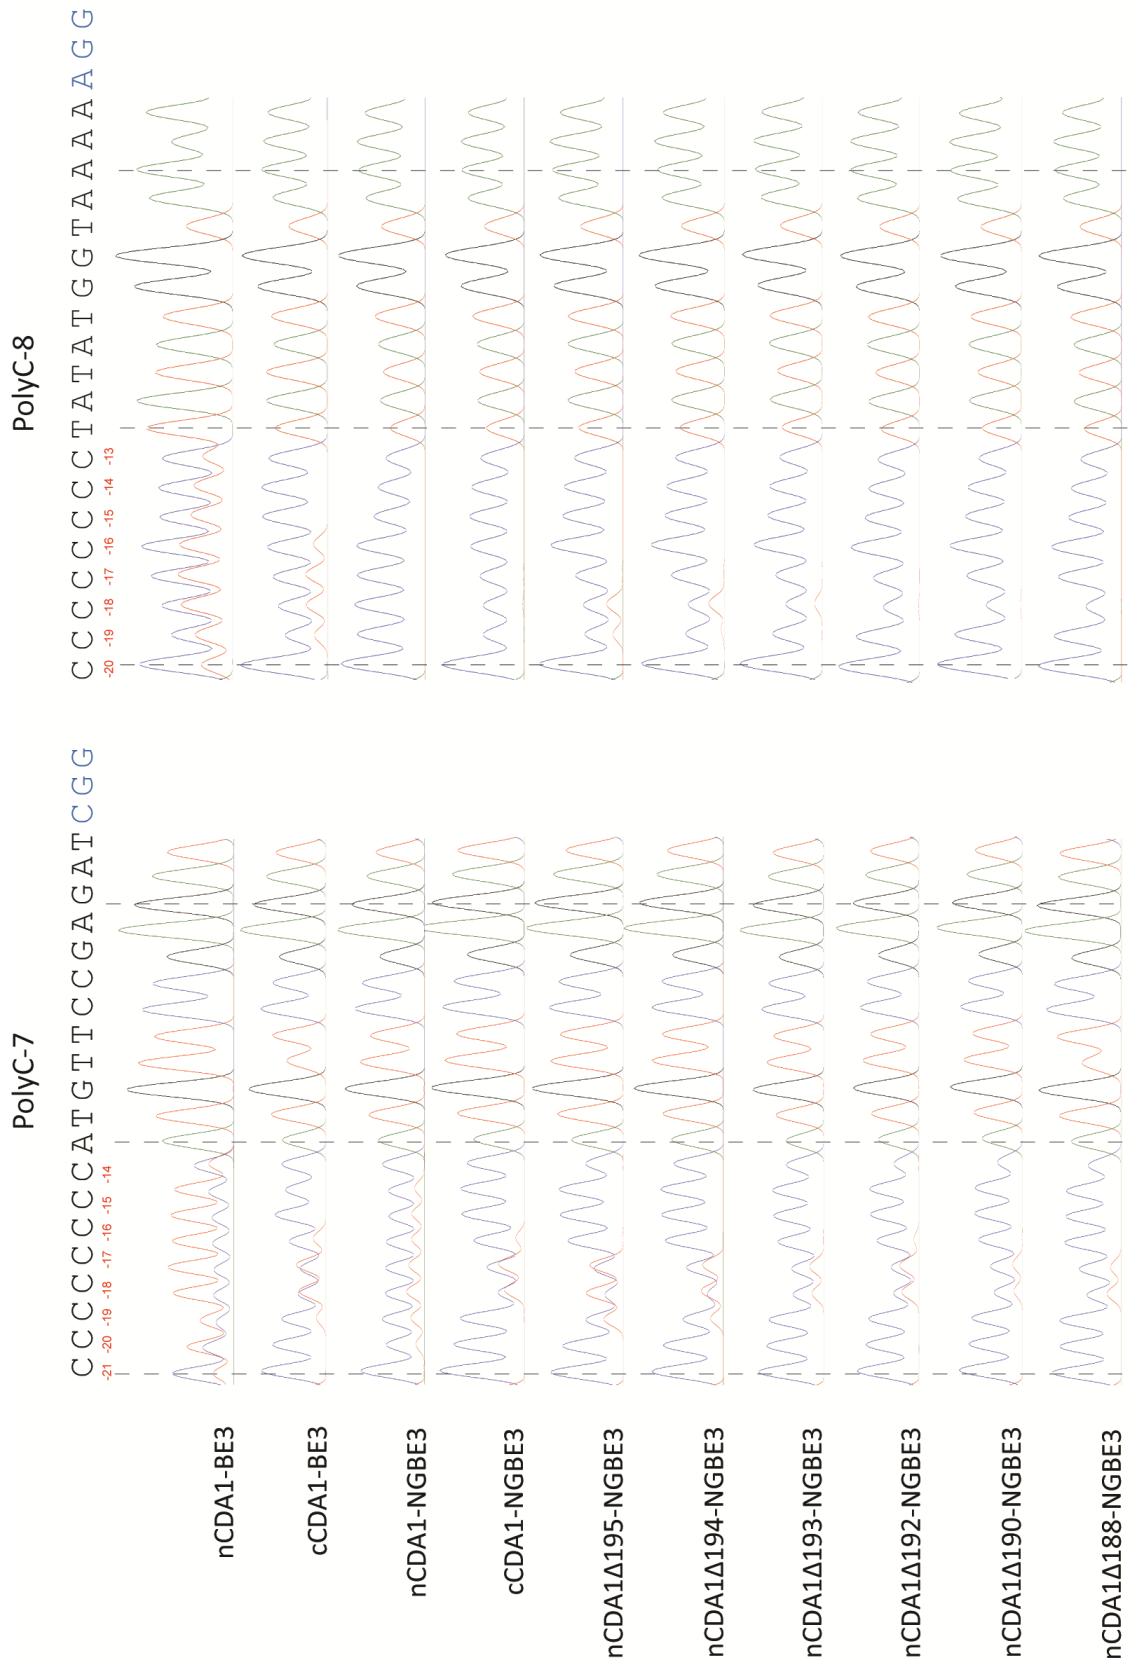

**Supplementary Figure 7** Analysis of base editing of a set of SpCas9-NG BEs fused to the full-length CDA1 (nCDA1-NGBE3) or C-terminally truncated versions of CDA1



(nCDA1 $\Delta$ 195-NGBE3; nCDA1 $\Delta$ 194-NGBE3; nCDA1 $\Delta$ 193-NGBE3; nCDA1 $\Delta$ 192-NGBE3; nCDA1 $\Delta$ 190-NGBE3; nCDA1 $\Delta$ 188-NGBE3) in two target sequences containing the PAM sequence NGG (PolyC-7, PolyC-8). Both target sequences contain a polyC stretch upstream of the PAM. Note that the PAM sequence NGG can be recognized by both the wild-type Cas9 (as in nCDA1-BE3 and cCDA1-BE3) and the SpCas9-NG variants. The amplified target sequences were directly sequenced by the dideoxy chain termination method (see Methods), and the sequence chromatograms are shown for each BE. The nucleotide sequences are shown above the chromatograms, with the PAM indicated in blue and the positions of the cytidines in the polyC stretch given in red (relative to the PAM). The reciprocal full-length fusion, cCDA1-NGBE3, was also analyzed.

**PolyC-7** CTTTCCCCCCCCATGTTCCGAGATCGG  
4-26-18-17-16-15-14-13 7-8

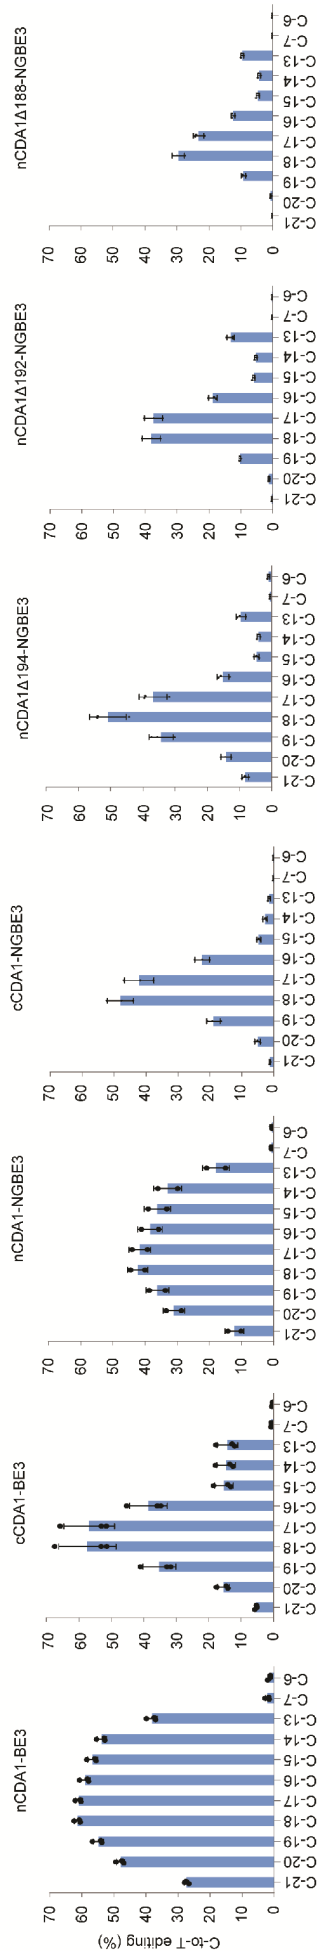

**PolyC-8** TATACCCCCCTATATGGTAAAAAGG  
20-18-17-16-15-14-13

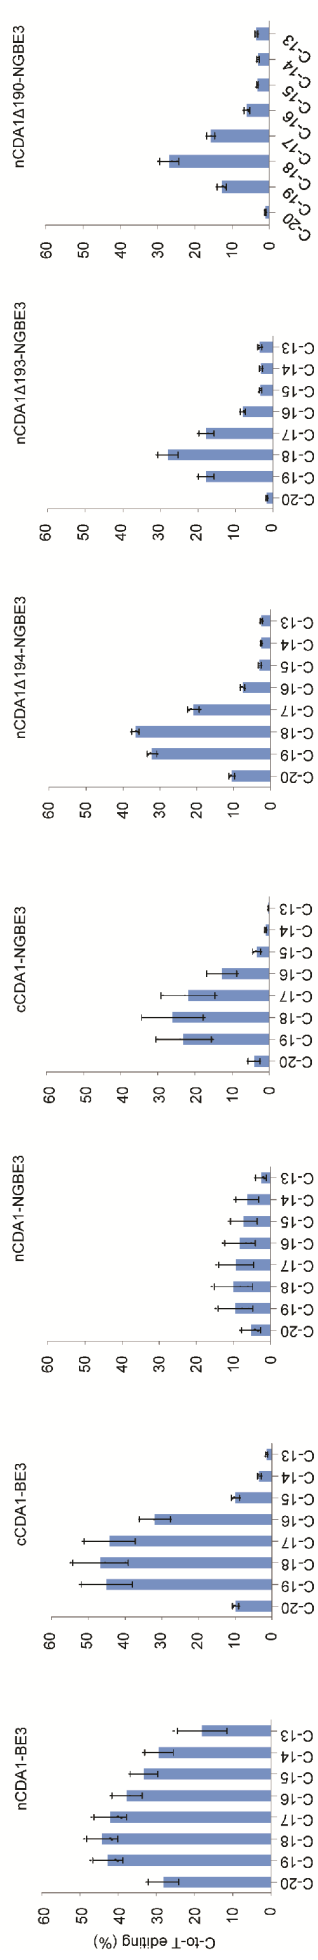

**Supplementary Figure 8** Quantitative analysis of base editing outcomes obtained with a set of SpCas9-NG BEs fused to the full-length CDA1 (nCDA1-NGBE3) or C-terminally truncated versions of CDA1 (nCDA1 $\Delta$ 194-NGBE3; nCDA1 $\Delta$ 193-NGBE3; nCDA1 $\Delta$ 192-NGBE3; nCDA1 $\Delta$ 190-NGBE3; nCDA1 $\Delta$ 188-NGBE3) in comparison to the two full-length CDA1 fusions to the wild-type Cas9 (nCDA1-BE3; cCDA1-BE3). Both tested target sequences contain the PAM sequence NGG (PolyC-7, PolyC-8). The nucleotide sequences are shown above the diagrams, with the PAM indicated in blue and the positions of the cytidines in the polyC stretch given in red (relative to the PAM). % of C-to-T editing represents the percentage of total sequencing reads with the target C converted to T. Values and error bars represent the mean and standard deviation of three independent biological replicates. Source data are provided as a Source Data file.

**a**

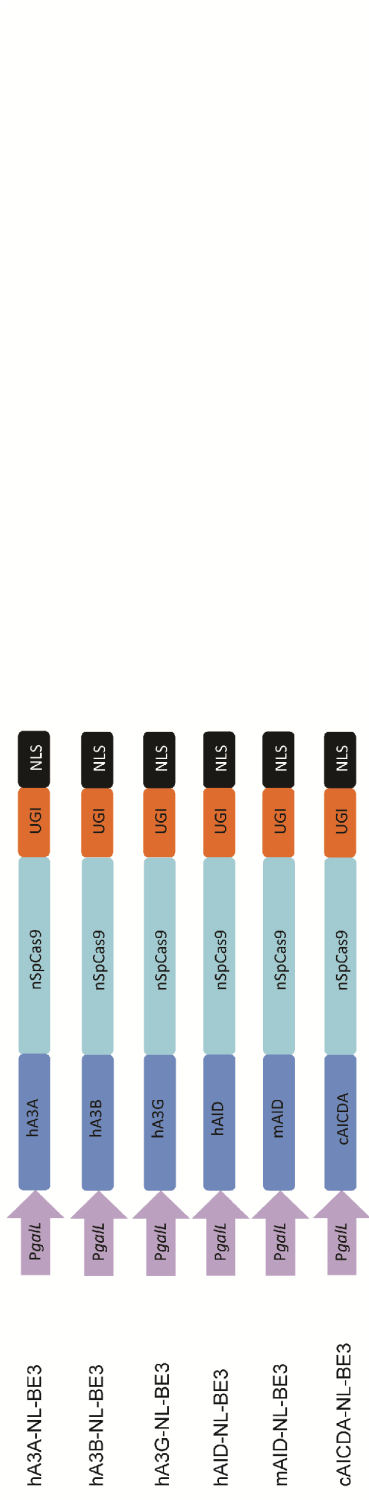

**b**

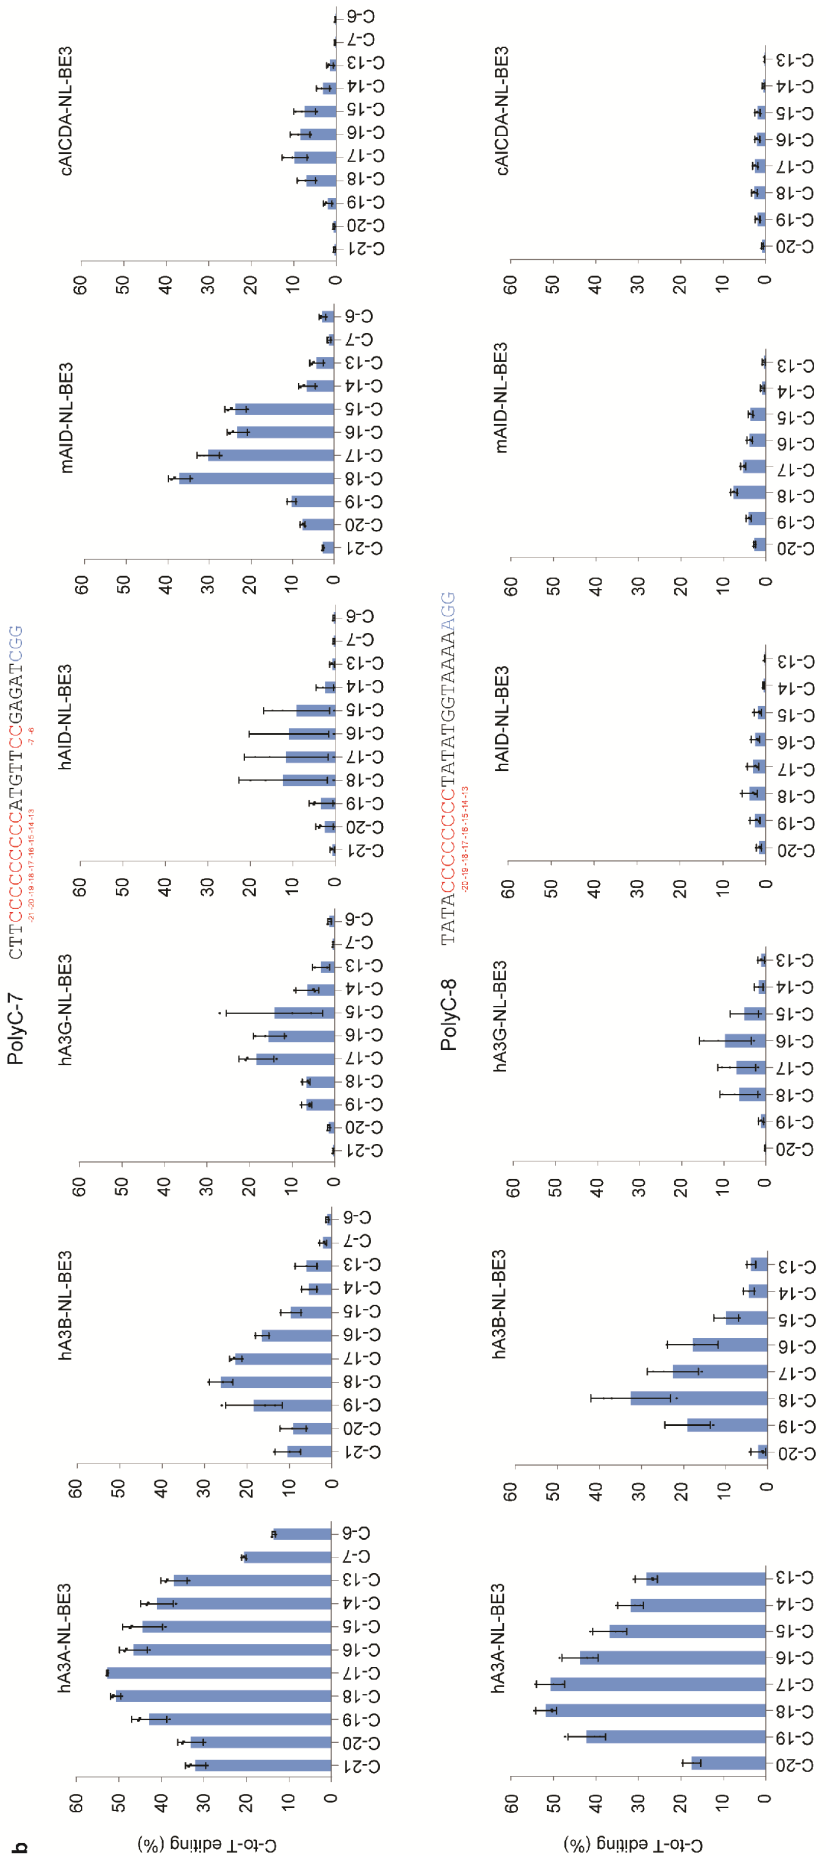

**Supplementary Figure 9** Screening of deaminases directly fused to Cas9 (without linkers) for efficient base editing. **a** Series of new BEs constructed by directly fusing different APOBEC and AID deaminases with the Cas9 nickase (nCas9) and the uracil DNA glycosylase inhibitor (UGI) when targeting two polyC sites (polyC-7 and polyC-8). **b** Base editing outcomes of new BEs when targeting two polyC sites (polyC-7 and polyC-8). The sequence of each target site is shown with the numbers indicating the position of possible editing targets (red) relative to the PAM (blue). % of C-to-T editing represents the percentage of total sequencing reads with the target C converted to T. Values and error bars represent the mean and standard deviation of three independent biological replicates. hA3A: human *APOBEC3A* (GenBank accession number NM\_145699); hA3B: human *APOBEC3B* (NM\_004900); hA3G: human *APOBEC3G* (NM\_021822); hAID: human *AID* (NM\_020661); mAID: mouse *AID* (NM\_009645); cAICDA: channel catfish *AICDA* (NM\_001200185). Source data underlying panels **b** are provided as a Source Data file.

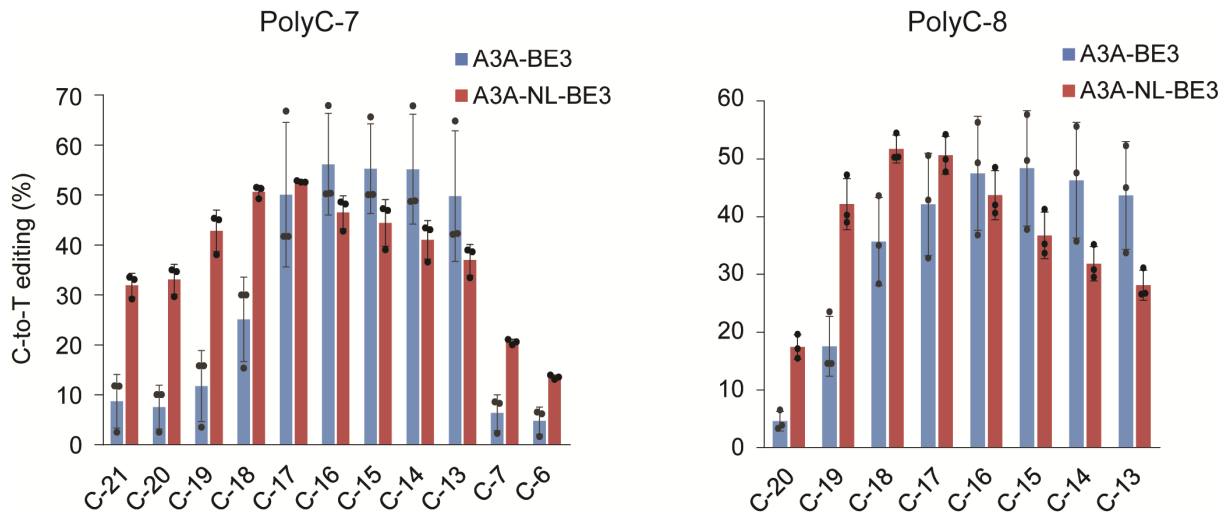

**Supplementary Figure 10** Removal of the linker between A3A and nCas9 broadens the width of the editing window while not appreciably affecting editing efficiency. Two polyC target sequences (polyC-7 and polyC-8; see Supplementary Figure 9) were tested. The x-axis shows the target Cs and their positions relative to the PAM. % of C-to-T editing represents the percentage of total sequencing reads with the target C converted to T. Values and error bars represent the mean and standard deviation of three independent biological replicates. Source data are provided as a Source Data file.

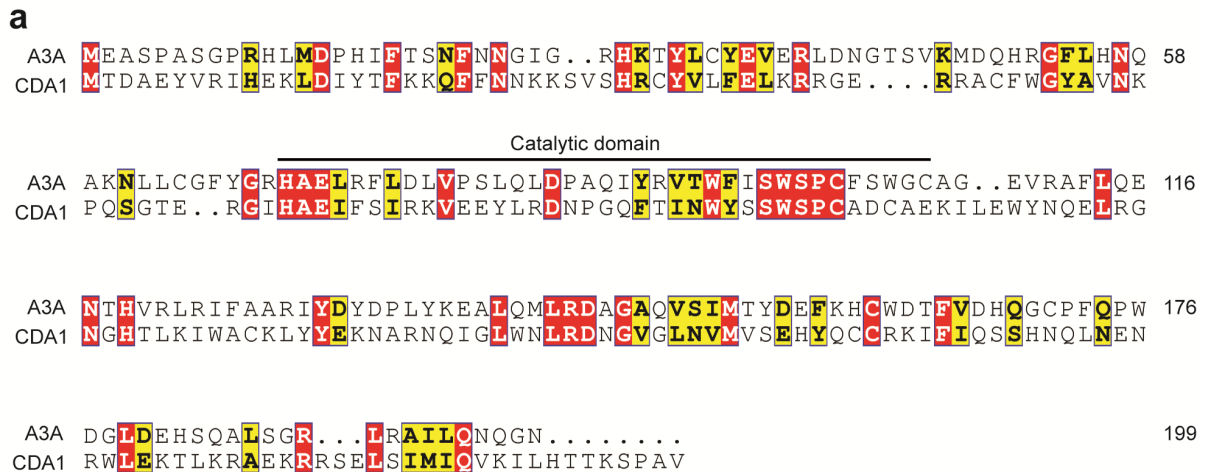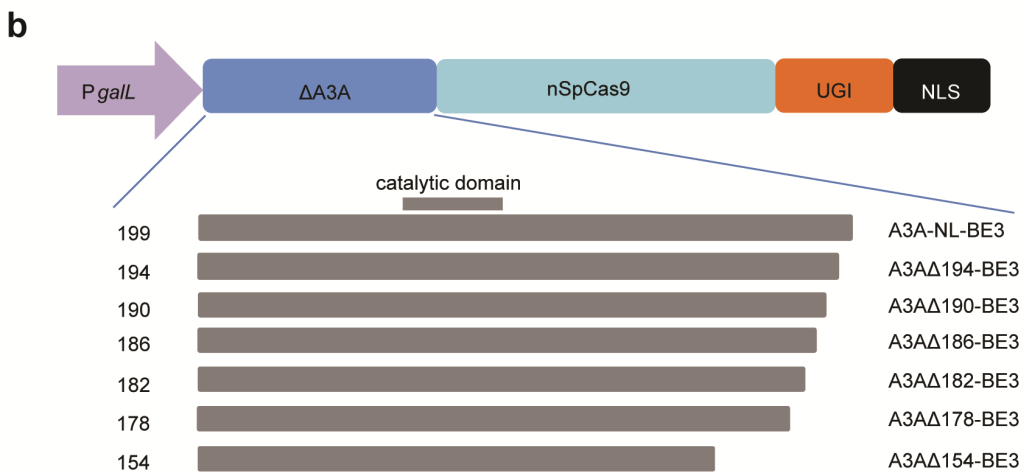

**Supplementary Figure 11** Design of base editors with truncated A3A domains. **a** Amino acid sequence alignment of A3A and CDA1. The catalytic domain is indicated by the black horizontal line. The alignment was created by CLUSTAL W (ref. 43; <https://www.genome.jp/tools-bin/clustalw>) and graphically formatted with the help of the ESPript 3.0 server (ref. 44; <http://esprict.ibcp.fr/ESPript/ESPript/>). Identical amino acid residues are marked in red, similar residues in yellow. **b** Schematic representation of BEs with C-terminal A3A truncations. The truncated variants are named after the last A3A residue included.

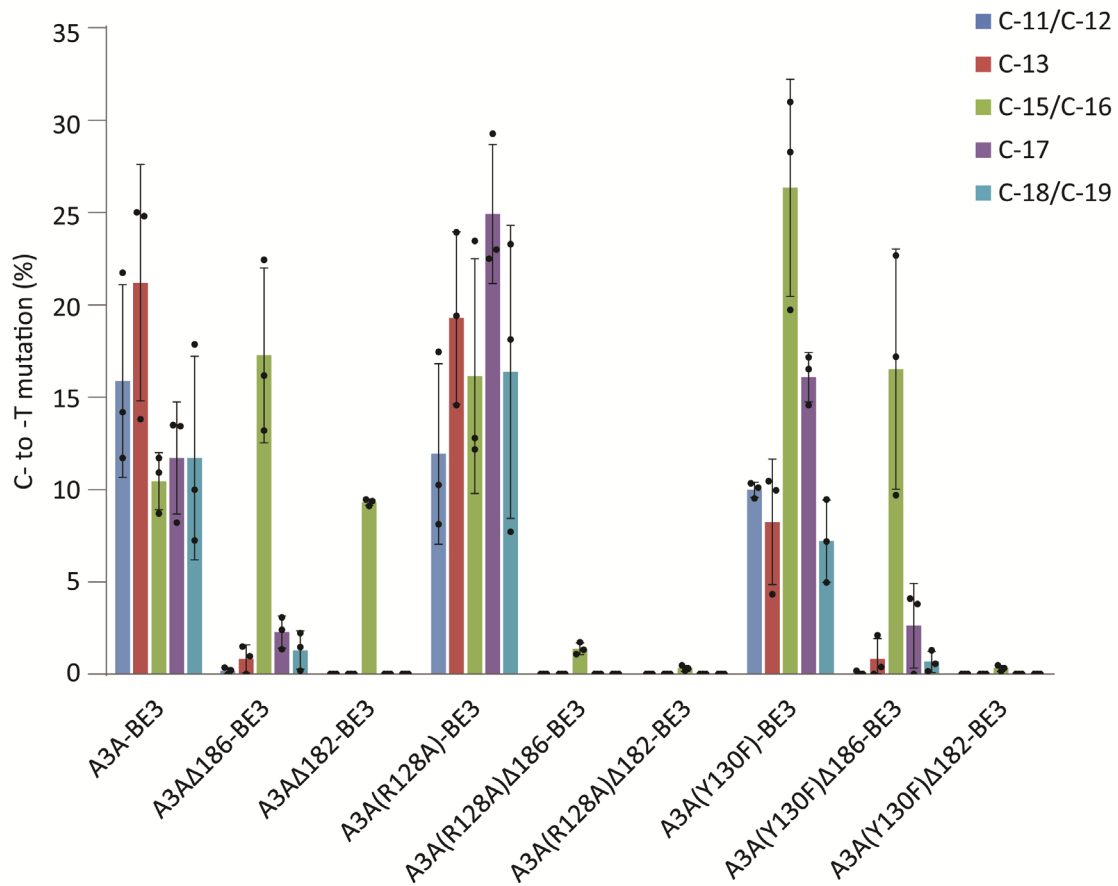

**Supplementary Figure 12** Base editing outcomes of A3A-BE3, two narrow-window A3AΔ-BE3 variants, two recently reported mutant BE3 variants that reduce off-target RNA editing (A3A(R128A)-BE3, A3A(Y130F)-BE3; 33) and the combinations of these mutations with each of the two narrow-window A3AΔ-BE3 variants. Five sites in the yeast *Can1* gene (containing Cs at different positions) were targeted and their sequences are listed in Supplementary Table 1. Edited clones were identified by using the canavanine selection strategy (see Methods). The x-axis represents the target Cs within the protospacers. The y-axis shows their C-to-T editing frequencies (see Methods). Values and error bars represent the mean and standard deviation of three independent biological replicates. Source data are provided as a Source Data file.



**a**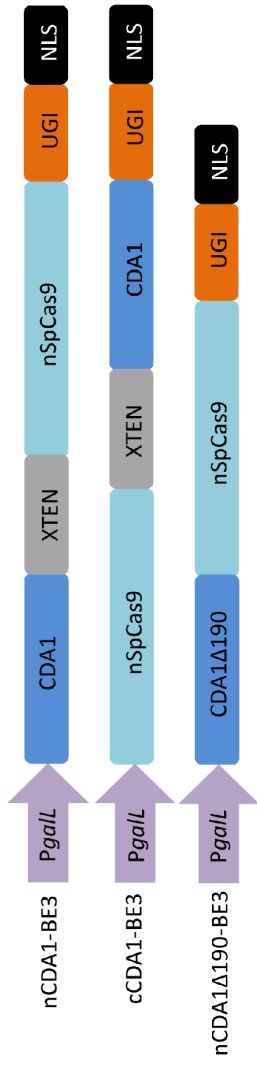**b**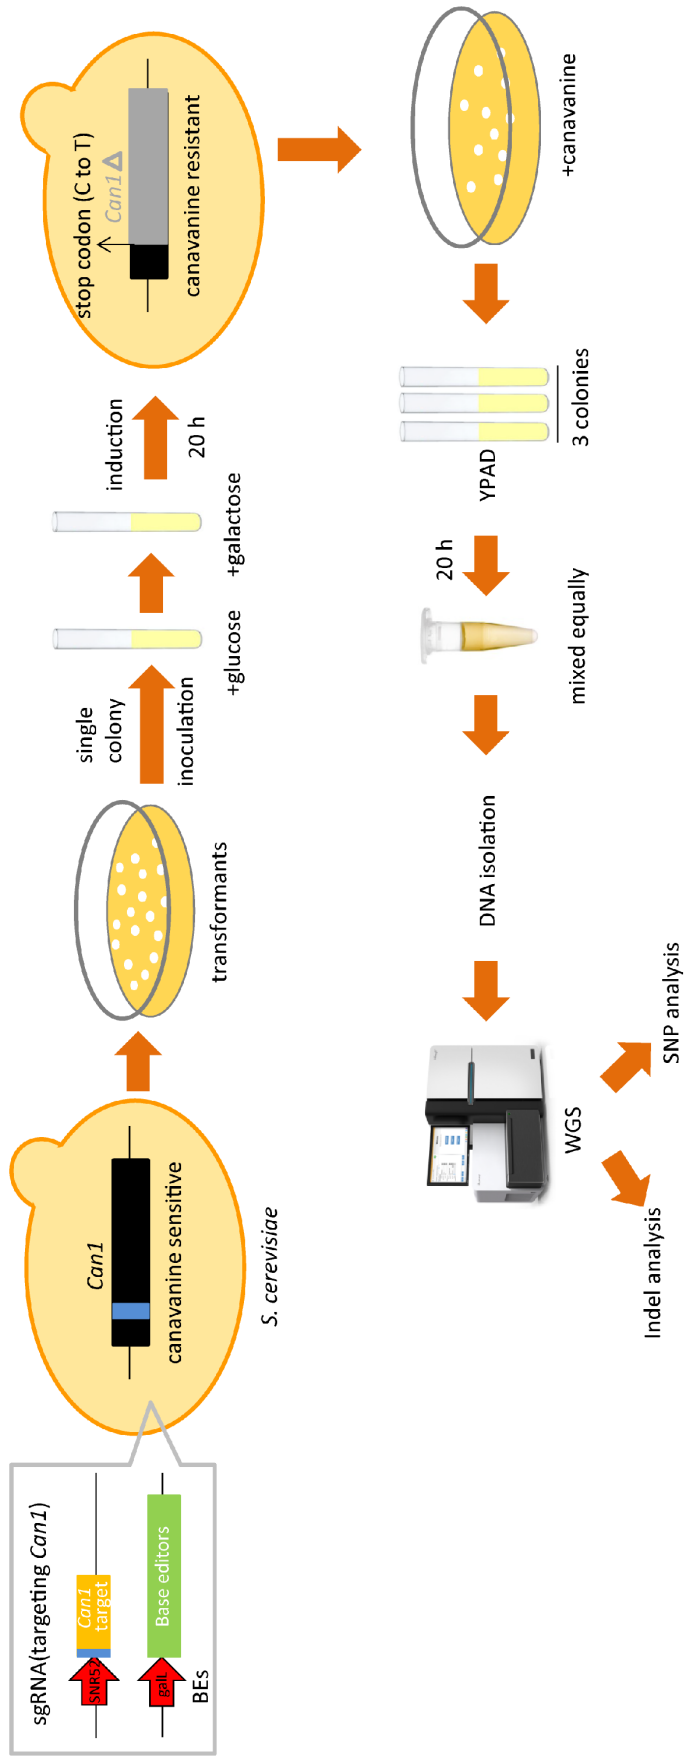

**Supplementary Figure 13** Analysis of off-target editing induced by base editors nCDA1-BE3, cCDA1-BE3 and nCDA1 $\Delta$ 190-BE3 in yeast. **a** Schematic representation of the three base editors. **b** Experimental workflow.

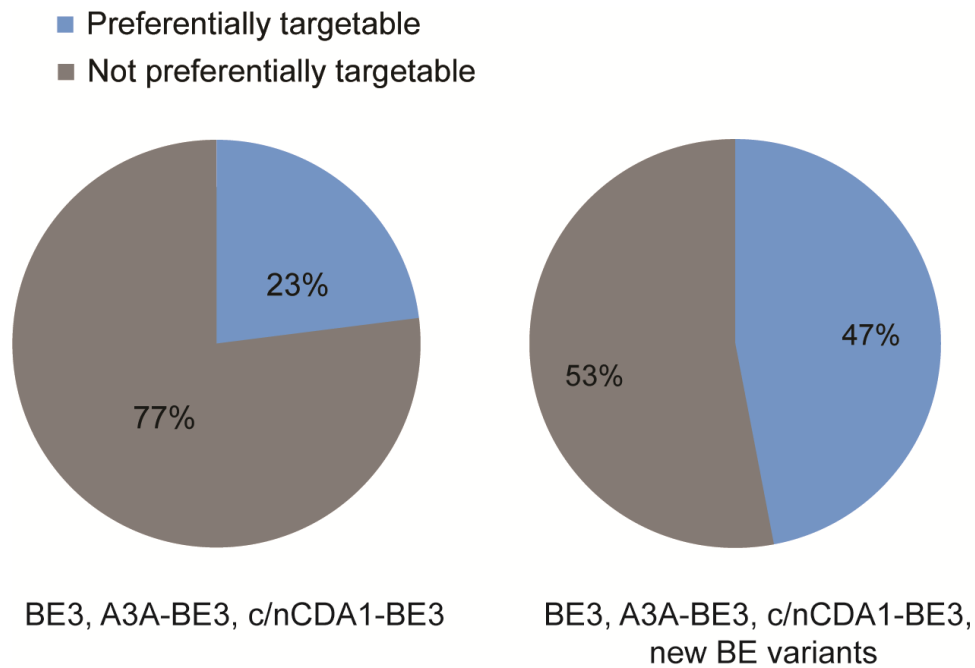

**Supplementary Figure 14** Fraction of pathogenic T-to-C and A-to-G SNPs in the ClinVar database (5074 mutations in total; ref. 8) that can be precisely addressed by the BEs available previously (left) and the expanded set of BEs that includes the high-precision BEs developed in the course of this work (right). The editing windows were assumed as follows: BE3 and A3A-BE3: C<sub>-13</sub> to C<sub>-17</sub>; cCDA1-BE3: C<sub>-16</sub> to C<sub>-19</sub>; nCDA1-BE3: C<sub>-14</sub> to C<sub>-20</sub> (refs. 15, 22, 23). The BE variants described in this work, including the A3A $\Delta$ -BE3 and nCDA1 $\Delta$ -BE3 mutants, were assumed to have a narrowed window (C<sub>-15</sub> to C<sub>-16</sub>) recognizing the PAM NGG and an editing preference of C<sub>-18</sub> > C<sub>-17</sub> > C<sub>-19</sub> recognizing the PAM NG, respectively.
